# Supplementary material for: Comparison of nitrate formation mechanisms from free amino acids and amines during ozonation: a computational study
Source: Royal Society of Chemistry journal article supplement (doi:10.1039/d2em00501h), 2023-01-01
Supplement: d2em00501h1.pdf [file d2em00501h1.pdf]

## Supporting Information

# Comparison of nitrate formation mechanisms from free amino acids and amines during ozonation: a computational study

*Shuning Yin, Qunfang Shen, Yong Dong Liu\*, Rugang Zhong*

Beijing Key Laboratory of Environmental and Viral Oncology,  
College of Life Science & Bioengineering, Beijing University of Technology,  
Beijing 100124, China

\*Corresponding author. Phone: +86-10-6739-6211; fax: +86-10-6739-2001.

E-mail: [ydliu@bjut.edu.cn](mailto:ydliu@bjut.edu.cn).

82 Pages

9 Tables

5 Figures

67 Cartesian orientations of transition states

## Contents

\*Corresponding author. Fax: +86-10-6739-2001. E-mail: [ydliu@bjut.edu.cn](mailto:ydliu@bjut.edu.cn).

| <b>Item</b>                      | <b>Page</b> |
|----------------------------------|-------------|
| Text S1(Tables S1)               | 6           |
| Tables S2-4                      | 7           |
| Tables S5-S7                     | 8           |
| Table S8                         | 9           |
| Table S9                         | 10          |
| Figure S1                        | 11          |
| Figure S2                        | 12          |
| Figure S3                        | 13          |
| Figure S4                        | 14          |
| Figure S5                        | 15          |
| Standard orientation of Ts-G-a   | 16          |
| Standard orientation of Ts-G-b   | 17          |
| Standard orientation of Ts-G-c   | 18          |
| Standard orientation of Ts-G-c'  | 19          |
| Standard orientation of Ts-G-c'' | 20          |
| Standard orientation of Ts-G-d   | 21          |
| Standard orientation of Ts-G-d'  | 22          |
| Standard orientation of Ts-G-e   | 23          |
| Standard orientation of Ts-G-e'  | 24          |
| Standard orientation of Ts-G-g   | 25          |
| Standard orientation of Ts-G-h   | 26          |

|                                   |    |
|-----------------------------------|----|
| Standard orientation of Ts-G-h'   | 27 |
| Standard orientation of Ts-G-h''  | 28 |
| Standard orientation of Ts-G-i    | 29 |
| Standard orientation of Ts-S-a    | 30 |
| Standard orientation of Ts-S-b    | 31 |
| Standard orientation of Ts-S-c    | 32 |
| Standard orientation of Ts-S-c'   | 33 |
| Standard orientation of Ts-S-c''  | 34 |
| Standard orientation of Ts-S-d    | 35 |
| Standard orientation of Ts-S-d'   | 36 |
| Standard orientation of Ts-S-e    | 37 |
| Standard orientation of Ts-S-e'   | 38 |
| Standard orientation of Ts-S-g    | 39 |
| Standard orientation of Ts-S-h    | 40 |
| Standard orientation of Ts-S-h'   | 41 |
| Standard orientation of Ts-S-h''  | 42 |
| Standard orientation of Ts-S-i    | 43 |
| Standard orientation of Ts-F-a    | 44 |
| Standard orientation of Ts-F-a'   | 45 |
| Standard orientation of Ts-F-a''  | 46 |
| Standard orientation of Ts-F-a''' | 47 |
| Standard orientation of Ts-F-b    | 48 |

|                                   |    |
|-----------------------------------|----|
| Standard orientation of Ts-F-b'   | 49 |
| Standard orientation of Ts-F-c    | 50 |
| Standard orientation of Ts-F-c'   | 51 |
| Standard orientation of Ts-F-d    | 52 |
| Standard orientation of Ts-F-e    | 53 |
| Standard orientation of Ts-F-f    | 54 |
| Standard orientation of Ts-H-a    | 55 |
| Standard orientation of Ts-H-a'   | 56 |
| Standard orientation of Ts-H-a''  | 57 |
| Standard orientation of Ts-H-a''' | 58 |
| Standard orientation of Ts-H-b    | 59 |
| Standard orientation of Ts-H-b'   | 60 |
| Standard orientation of Ts-H-c    | 61 |
| Standard orientation of Ts-H-c'   | 62 |
| Standard orientation of Ts-H-d    | 63 |
| Standard orientation of Ts-H-e    | 64 |
| Standard orientation of Ts-M-e'   | 65 |
| Standard orientation of Ts-M-f'   | 66 |
| Standard orientation of Ts-M-h    | 67 |
| Standard orientation of Ts-E-e'   | 68 |
| Standard orientation of Ts-E-f'   | 69 |
| Standard orientation of Ts-E-h    | 70 |

|                                  |    |
|----------------------------------|----|
| Standard orientation of Ts-B-a   | 71 |
| Standard orientation of Ts-B-b   | 72 |
| Standard orientation of Ts-B-c   | 73 |
| Standard orientation of Ts-B-d   | 74 |
| Standard orientation of Ts-B-d'  | 75 |
| Standard orientation of Ts-B-e   | 76 |
| Standard orientation of Ts-B-e'  | 77 |
| Standard orientation of Ts-B-f   | 78 |
| Standard orientation of Ts-B-f'  | 79 |
| Standard orientation of Ts-B-f'' | 80 |
| Standard orientation of Ts-B-g   | 81 |
| Standard orientation of Ts-B-h   | 82 |

## Text S1

### Calculation details of estimations of $pK_a$ values for the nitroalkanes

Based on the results from our previous work,<sup>1</sup> the linear equation of the bond dissociation energies (BDEs) of C–H bonds and their experimental  $pK_a$  values is displayed in eq. (1).

$$pK_a = 0.504 \times \text{BDEs} - 70.788 \quad (1)$$

Based on the above equation, the calculated  $pK_a$  and BDEs of 9 nitroalkanes ( $O_2N$ -CHR) formed from amines were calculated at the M06-2X/6-311G(d) level with the SMD solvent model and are listed in Table S1.

## Table S1

Table S1 The  $pK_a$  values and BDEs of nine nitroalkanes.

| Nitroalkanes            | BDEs (kcal/mol) | $pK_a$ |
|-------------------------|-----------------|--------|
| $O_2N-CH_3$             | 170.3           | 15.0   |
| $O_2N-CH_2CH_3$         | 169.0           | 14.4   |
| $O_2N-CH(CH_3)-C_6H_5$  | 164.4           | 12.1   |
| $O_2N-CH_2CH_2OH$       | 165.2           | 12.5   |
| $O_2N-CH_2-C_6H_5-CH_3$ | 163.0           | 11.4   |
| $O_2N-CH_2-C_6H_5$      | 162.5           | 11.1   |
| $O_2N-CH_2-C_6H_5-Cl$   | 161.5           | 10.6   |
| $O_2N-CH_2-C_6H_5-NO_2$ | 157.5           | 8.6    |
| $O_2N-CH_2-COOH$        | 168.7           | 14.2   |

### Reference:

1 Y. Han, Y. Zhou, Y. D. Liu and R. Zhong, Reaction Mechanisms of Histidine and Carnosine with Hypochlorous Acid Along with Chlorination Reactivity of N-Chlorinated Intermediates: A Computational Study, *Chem. Res. Toxicol.*, 2022, **35**, 750-759.

## Table S2

Table S2 Activation free energies (at 298 K and 1 atm, in kcal/mol) calculated with different methods and basis sets for reactions of glycine with ozone.

| basis set  | M05 |      | M06 |      | LC- $\omega$ PBE |      |
|------------|-----|------|-----|------|------------------|------|
|            | SMD | CPCM | SMD | CPCM | SMD              | CPCM |
| 6-31G(d)   | 7.2 | 11.0 | 2.5 | 4.2  | 9.4              | 8.0  |
| 6-311G(d)  | 9.2 | 10.3 | 2.0 | 5.6  | 6.7              | 7.8  |
| 6-31+G(d)  | 2.9 | 8.7  | 4.7 | 0.8  | 8.7              | 7.9  |
| 6-311+G(d) | 3.3 | 9.7  | 0.4 | 3.8  | 6.9              | 6.2  |

## Table S3

Table S3 Activation free energies (at 298 K and 1 atm, in kcal/mol) calculated with different methods and basis sets for reactions of serine with ozone.

| basis set  | M05 |      | M06 |      | LC- $\omega$ PBE |      |
|------------|-----|------|-----|------|------------------|------|
|            | SMD | CPCM | SMD | CPCM | SMD              | CPCM |
| 6-31G(d)   | 6.2 | 10.8 | 3.7 | 5.0  | 9.1              | 6.7  |
| 6-311G(d)  | 7.2 | 10.6 | 2.4 | 5.2  | 7.2              | 7.0  |
| 6-31+G(d)  | 3.3 | 7.3  | 1.5 | 3.1  | 8.2              | 7.6  |
| 6-311+G(d) | 5.4 | 8.0  | 3.8 | 3.9  | 8.1              | 6.7  |

## Table S4

Table S4 Activation free energies (at 298 K and 1 atm, in kcal/mol) calculated with different methods and basis sets for reactions of alanine with ozone.

| basis set  | M05 |      | M06 |      | LC- $\omega$ PBE |      |
|------------|-----|------|-----|------|------------------|------|
|            | SMD | CPCM | SMD | CPCM | SMD              | CPCM |
| 6-31G(d)   | 7.4 | 10.9 | 1.5 | 4.9  | 7.0              | 9.6  |
| 6-311G(d)  | 6.5 | 10.5 | 1.9 | 4.5  | 7.3              | 9.4  |
| 6-31+G(d)  | 2.8 | 8.7  | 4.8 | 3.6  | 7.7              | 9.2  |
| 6-311+G(d) | 3.8 | 8.3  | 2.3 | 3.2  | 6.8              | 9.5  |

## Table S5

Table S5. Activation free energies (at 298 K and 1 atm, in kcal/mol) calculated with different methods along with 6-311++G(d,p) basis set for ozonation of TMA/TEA, DMA/DEA and MA/EA.

| Calculation models |      | TMA+O <sub>3</sub> | TEA+O <sub>3</sub> | DMA+O <sub>3</sub> | DEA+O <sub>3</sub> | MA+O <sub>3</sub> | EA+O <sub>3</sub> |
|--------------------|------|--------------------|--------------------|--------------------|--------------------|-------------------|-------------------|
| M05                | cpcm | 13.9               | 14.3               | 13.7               | 13.0               | 12.9              | 13.7              |
|                    | smd  | 9.0                | 11.9               | 8.4                | 7.4                | 6.5               | 6.3               |
| LC- $\omega$ PBE   | cpcm | 8.4                | 9.6                | 8.9                | 9.4                | 10.1              | 10.4              |
|                    | smd  | 10.4               | 12.8               | 4.7                | 5.9                | 5.3               | 5.1               |

## Table S6

Table S6 The  $\Delta G^\ddagger$  values (at 298 K and 1 atm, in kcal/mol) calculated with different functionals and CPCM solvent model.

| Step | M05-2X      | M06-2X      | $\omega$ B97X-D | BMK         | LC- $\omega$ PBE |
|------|-------------|-------------|-----------------|-------------|------------------|
| G-e  | 7.8 (10.8)  | 7.8 (10.6)  | 8.3 (10.6)      | 7.3 (10.3)  | 12.7 (10.4)      |
| G-e' | 9.0 (8.3)   | 10.0 (8.2)  | 7.0 (6.9)       | 7.5 (7.4)   | 12.4 (11.7)      |
| G-g  | 15.8 (19.0) | 14.8 (18.2) | 16.0 (18.5)     | 14.1 (18.9) | 20.9 (18.6)      |

values in ( ) were obtained with the singlet point calculation at the CCSD(T)/6-311+G(d) level.

## Table S7

Table S7 Activation free energies ( $\Delta G^\ddagger$ , at 298 K and 1 atm, in kcal/mol) of step M-h for nitro-compounds in the neutral and anionic forms.

| Nitro-compounds          | $\Delta G^\ddagger$ of neutral form | $\Delta G^\ddagger$ of anionic form | pK <sub>a</sub> |
|--------------------------|-------------------------------------|-------------------------------------|-----------------|
| Nitromethane (NM)        | 44.4                                | 14.9                                | 15.0            |
| Nitroethane (NE)         | 41.6                                | 11.2                                | 14.4            |
| Nitromethylbenzene (NMB) | 29.7                                | 4.3                                 | 11.1            |



**Table S8**

Table S8  $\Delta G^\ddagger$  values (kcal/mol) of steps M-a, M-c, M-d, and M-h for nitrate formation in the ozonation of primary amines and the values in bracket are activation free energies of rate-limiting step ( $\Delta G_{\text{rls}}^\ddagger$ ).

| Compounds                   | Structure formula             | Step M-a | Step M-c | Step M-d | Step M-h | Yield(%) |
|-----------------------------|-------------------------------|----------|----------|----------|----------|----------|
| Methylamine (MA)            | <chem>H2N-CH3</chem>          | 10.4     | 10.4     | 9.5      | (28.5)   | --       |
| Ethylamine (EA)             | <chem>H2N-CH2-CH3</chem>      | 10.1     | 10.1     | 9.3      | (20.8)   | 8.5±1.6  |
| $\alpha$ -Methylbenzylamine | <chem>H2N-CH(CH3)-C6H5</chem> | 11.3     | 12.0     | 9.4      | (12.6)   | 19.0±0.8 |
| Ethanolamine                | <chem>H2N-CH2-CH2-OH</chem>   | 12.0     | (13.5)   | 12.4     | 11.7     | 22.0±1.4 |
| 4-Methylbenzylamine         | <chem>H2N-CH2-C6H4-CH3</chem> | 11.1     | (12.9)   | 9.1      | 11.3     | 23.0±5.4 |
| Benzylamine(BA)             | <chem>H2N-CH2-C6H5</chem>     | 10.6     | (12.0)   | 9.0      | 9.8      | 33.0±0.6 |
| 4-Chlorobenzylamine         | <chem>H2N-CH2-C6H4-Cl</chem>  | 13.1     | (13.6)   | 8.9      | 9.3      | 41.7±1.2 |
| 4-Nitrobenzylamine          | <chem>H2N-CH2-C6H4-NO2</chem> | 14.4     | (15.5)   | 9.1      | 3.3      | 71.7±0.7 |

**Table S9**

Table S9  $\Delta G_{\text{nycs}}^\ddagger$  values (at 298 K and 1 atm, in kcal/mol) of nitrate formation from primary and secondary amines during ozonation and BDEs( $C_\alpha\text{-H}$ ) (in kcal/mol) for nitroalkanes.

| Amine                       | Structure formula                                     | Nitroalkane                                                     | $\Delta G_{\text{nycs}}^\ddagger$ | BDEs  |
|-----------------------------|-------------------------------------------------------|-----------------------------------------------------------------|-----------------------------------|-------|
| Methylamine (MA)            | $\text{H}_2\text{N}-\text{CH}_3$                      | $\text{O}^-\text{N}^+(\text{O})\text{CH}_3$                     | 25.8                              | 170.3 |
| Ethylamine (EA)             | $\text{H}_2\text{N}-\text{CH}_2\text{CH}_3$           | $\text{O}^-\text{N}^+(\text{O})\text{CH}_2\text{CH}_3$          | 21.3                              | 169.0 |
| $\alpha$ -Methylbenzylamine |                                                       |                                                                 | 12.6                              | 164.4 |
| Ethanolamine                | $\text{H}_2\text{N}-\text{CH}_2-\text{CH}_2\text{OH}$ | $\text{O}^-\text{N}^+(\text{O})\text{CH}_2\text{CH}_2\text{OH}$ | 11.7                              | 165.2 |
| 4-Methylbenzylamine         |                                                       |                                                                 | 11.3                              | 163   |
| Benzylamine(BA)             |                                                       |                                                                 | 9.8                               | 162.5 |
| 4-Chlorobenzylamine         |                                                       |                                                                 | 9.3                               | 161.5 |
| 4-Nitrobenzylamine          |                                                       |                                                                 | 3.3                               | 157.5 |
| <i>N</i> -methylbenzylamine |                                                       |                                                                 | 9.8                               | 162.5 |
| Diethylamine (DEA)          | $\text{HN}(\text{CH}_2\text{CH}_3)_2$                 | $\text{O}^-\text{N}^+(\text{O})\text{CH}_2\text{CH}_3$          | 21.3                              | 169.0 |
| Sarcosine                   | $\text{HN}(\text{CH}_3)-\text{CH}_2-\text{COO}^-$     | $\text{O}^-\text{N}^+(\text{O})\text{CH}_2\text{COO}^-$         | 23.2                              | 168.7 |
| Dimethylamine (DMA)         | $\text{HN}(\text{CH}_3)_2$                            | $\text{O}^-\text{N}^+(\text{O})\text{CH}_3$                     | 25.8                              | 170.3 |

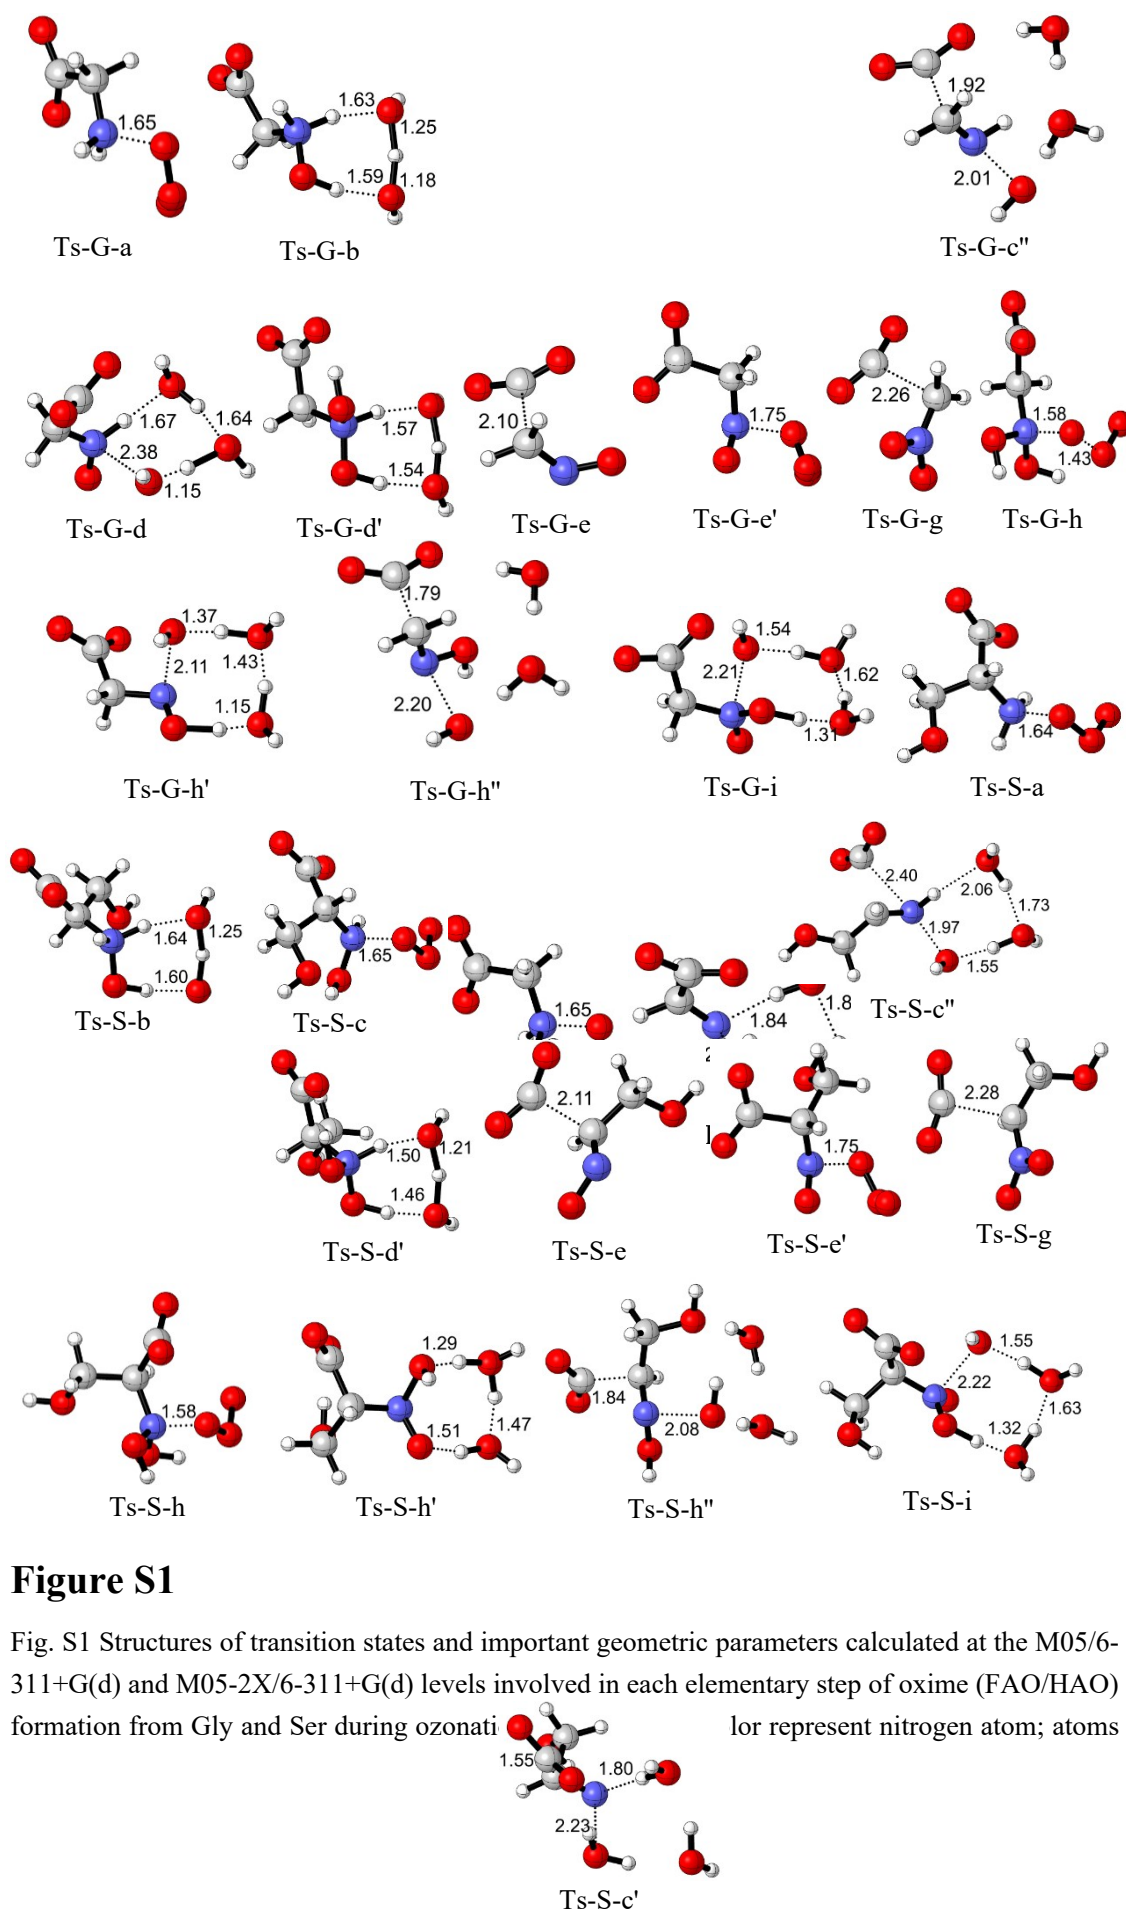

**Figure S1**

Fig. S1 Structures of transition states and important geometric parameters calculated at the M05/6-311+G(d) and M05-2X/6-311+G(d) levels involved in each elementary step of oxime (FAO/HAO) formation from Gly and Ser during ozonation. Carbon atoms represent carbon atom; oxygen atoms represent oxygen atom; nitrogen atoms represent nitrogen atom; atoms

in red represent oxygen atom, atoms in white represent hydrogen atom; atoms in grey color represent carbon atom).

**Figure S2**

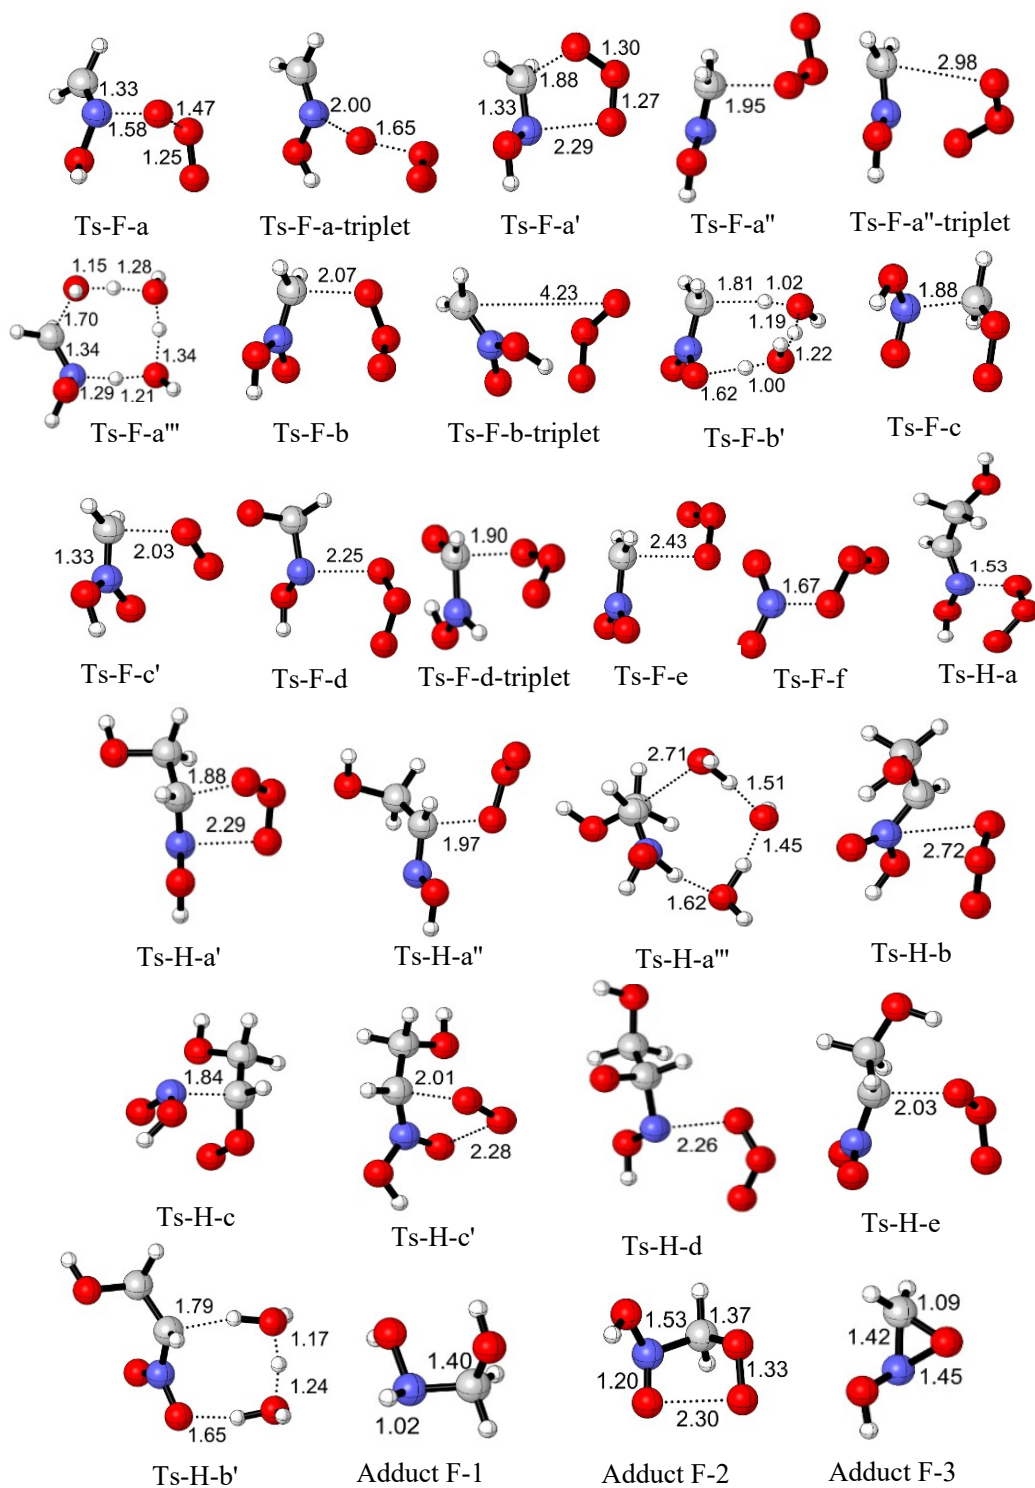

Fig. S2 Structures of transition states and important geometric parameters calculated at the M05/6-311G(d) levels involved in each elementary step of nitrate formation from FAO/HAO during ozonation (atoms in blue color represent nitrogen atom; atoms in red represent oxygen atom, atoms

in white represent hydrogen atom; atoms in grey color represent carbon atom).

**Figure S3**

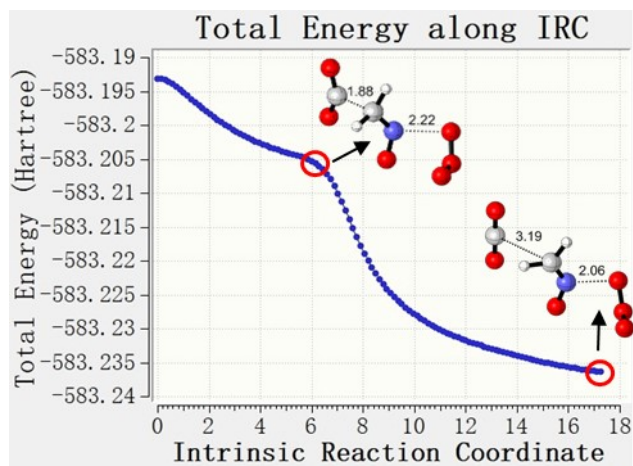

Fig. S3 IRC calculation results for the reactant formation in the ozonation of nitroso-Gly

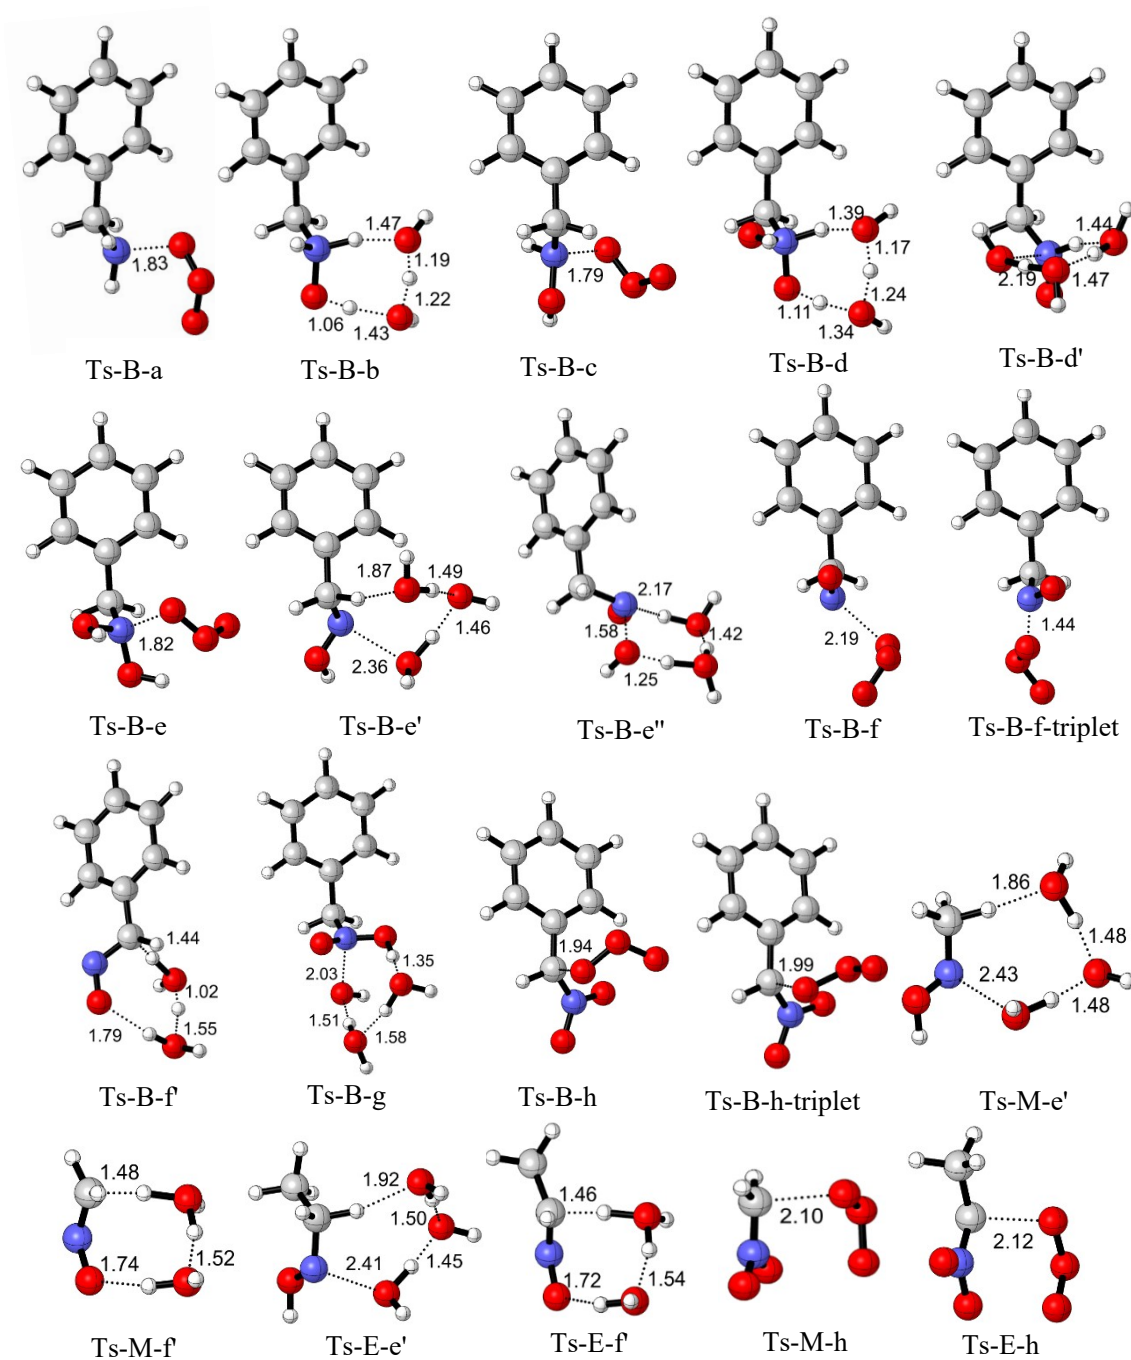

**Figure S4**

Fig. S4 Structures of transition states and important geometric parameters calculated at the LC- $\omega$ PBE/6-311++G(d,p) levels involved in each elementary step of MA/EA/BA degradation pathways during ozonation (atoms in blue color represent nitrogen atom; atoms in red represent oxygen atom, atoms in white represent hydrogen atom; atoms in grey color represent carbon atom).

## Figure S5

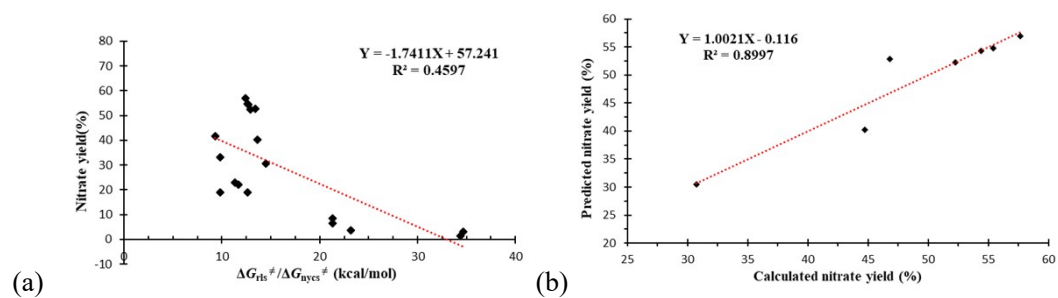

Fig. S5 (a) Correlation between nitrate yields and  $\Delta G_{rls}^{\ddagger}/\Delta G_{nycs}^{\ddagger}$  for AAs and amines; (b) correlation between nitrate yields and  $\Delta G_{rls}^{\ddagger}$  along with the ratio of  $k_{est}(G-e)/k_{est}(G-e')$  for 7 AAs.

## Standard orientation of Ts-G-a

Cartesian coordinates of all the transition states optimized at the M05/6-311G(d) level:

Standard orientation of transition state of Ts-G-a

State = 1-A

Charge = -1 Multiplicity = 1

Lowest Harmonic Vibrational Frequency (LHVF) = -503.47 cm<sup>-1</sup>

Standard orientation:

| Center<br>Number | Atomic<br>Number | Atomic<br>Type | Coordinates (Angstroms) |           |           |
|------------------|------------------|----------------|-------------------------|-----------|-----------|
|                  |                  |                | X                       | Y         | Z         |
| 1                | 7                | 0              | -0.307930               | -0.522992 | 0.574912  |
| 2                | 6                | 0              | 0.919263                | -0.947619 | -0.065027 |
| 3                | 8                | 0              | -2.614130               | -0.071001 | 0.091247  |
| 4                | 8                | 0              | -1.661713               | -0.911114 | -0.292996 |
| 5                | 8                | 0              | -2.364479               | 1.185120  | -0.337453 |
| 6                | 1                | 0              | -0.474441               | -0.884329 | 1.505023  |
| 7                | 1                | 0              | 0.685703                | -1.164581 | -1.111425 |
| 8                | 1                | 0              | -0.347406               | 0.503564  | 0.549785  |
| 9                | 1                | 0              | 1.297852                | -1.855435 | 0.399079  |
| 10               | 6                | 0              | 1.961513                | 0.218972  | -0.030119 |
| 11               | 8                | 0              | 1.493270                | 1.330022  | 0.291199  |
| 12               | 8                | 0              | 3.110696                | -0.103826 | -0.351493 |



## Standard orientation of Ts-G-b

Cartesian coordinates of all the transition states optimized at the M05/6-311+G(d) level:

Standard orientation of transition state of Ts-G-b

State = 1-A

Charge = -1 Multiplicity = 1

Lowest Harmonic Vibrational Frequency (LHVF) = -586.63 cm<sup>-1</sup>

Standard orientation:

| Center<br>Number | Atomic<br>Number | Atomic<br>Type | Coordinates (Angstroms) |           |           |
|------------------|------------------|----------------|-------------------------|-----------|-----------|
|                  |                  |                | X                       | Y         | Z         |
| 1                | 7                | 0              | 0.216304                | -0.420153 | 0.447535  |
| 2                | 1                | 0              | 0.740179                | 0.527699  | 0.433406  |
| 3                | 1                | 0              | -0.299294               | -0.487482 | 1.330539  |
| 4                | 6                | 0              | -0.794129               | -0.472008 | -0.618917 |
| 5                | 1                | 0              | -0.437162               | 0.078403  | -1.487386 |
| 6                | 1                | 0              | -0.927750               | -1.518618 | -0.892144 |
| 7                | 8                | 0              | 1.144111                | -1.451806 | 0.383950  |
| 8                | 8                | 0              | 1.798311                | 1.658385  | 0.292048  |
| 9                | 1                | 0              | 2.595937                | 0.847312  | -0.143595 |
| 10               | 1                | 0              | 1.604508                | 2.351403  | -0.342276 |
| 11               | 8                | 0              | 3.169126                | -0.171642 | -0.427623 |
| 12               | 1                | 0              | 2.009973                | -1.035225 | 0.006523  |
| 13               | 1                | 0              | 3.365916                | -0.207376 | -1.365923 |
| 14               | 6                | 0              | -2.125312               | 0.090734  | -0.092021 |
| 15               | 8                | 0              | -2.203774               | 0.215207  | 1.151598  |
| 16               | 8                | 0              | -2.988997               | 0.333929  | -0.950756 |

## Standard orientation of Ts-G-c

Cartesian coordinates of all the transition states optimized at the M05/6-311G(d) level:

Standard orientation of transition state of Ts-G-c

State = 1-A

Charge = -1 Multiplicity = 1

Lowest Harmonic Vibrational Frequency (LHVF) = -443.33 cm<sup>-1</sup>

Standard orientation:

| Center<br>Number | Atomic<br>Number | Atomic<br>Type | Coordinates (Angstroms) |           |           |
|------------------|------------------|----------------|-------------------------|-----------|-----------|
|                  |                  |                | X                       | Y         | Z         |
| 1                | 7                | 0              | -0.748225               | -0.782216 | 0.184648  |
| 2                | 6                | 0              | 0.426337                | -0.834960 | -0.660278 |
| 3                | 8                | 0              | -1.288704               | 1.517519  | 0.266489  |
| 4                | 8                | 0              | -1.755148               | 0.478541  | -0.246048 |
| 5                | 8                | 0              | -0.232986               | 1.987022  | -0.281625 |
| 6                | 1                | 0              | 0.238676                | -0.316776 | -1.602443 |
| 7                | 1                | 0              | -0.442704               | -0.690816 | 1.151528  |
| 8                | 1                | 0              | 0.659395                | -1.882899 | -0.888590 |
| 9                | 6                | 0              | 1.647705                | -0.213639 | 0.076058  |
| 10               | 8                | 0              | 1.514888                | -0.055655 | 1.308608  |
| 11               | 8                | 0              | 2.630143                | 0.022321  | -0.644285 |
| 12               | 8                | 0              | -1.562909               | -1.896177 | 0.123721  |
| 13               | 1                | 0              | -2.104310               | -1.770978 | -0.662585 |

## Standard orientation of Ts-G-c'

Cartesian coordinates of all the transition states optimized at the M05/6-311+G(d) level:

Standard orientation of transition state of Ts-G-c'

State = 1-A

Charge = -1 Multiplicity = 1

Lowest Harmonic Vibrational Frequency (LHVF) = -267.98 cm<sup>-1</sup>

Standard orientation:

| Center<br>Number | Atomic<br>Number | Atomic<br>Type | Coordinates (Angstroms) |           |           |
|------------------|------------------|----------------|-------------------------|-----------|-----------|
|                  |                  |                | X                       | Y         | Z         |
| 1                | 7                | 0              | -0.080696               | -0.943588 | 1.141774  |
| 2                | 6                | 0              | 1.245664                | -0.709396 | 0.963969  |
| 3                | 1                | 0              | 1.958520                | -1.557553 | 1.019317  |
| 4                | 1                | 0              | 1.469712                | -0.006183 | 1.791729  |
| 5                | 8                | 0              | -0.735918               | -1.296268 | -0.877489 |
| 6                | 1                | 0              | -0.285078               | -0.465781 | -1.115679 |
| 7                | 1                | 0              | -0.960817               | 0.675854  | 1.068191  |
| 8                | 8                | 0              | -3.203043               | -0.097850 | -0.429073 |
| 9                | 1                | 0              | -3.693448               | -0.490842 | 0.294463  |
| 10               | 1                | 0              | -1.664062               | -1.044166 | -0.711888 |
| 11               | 8                | 0              | -1.357284               | 1.524342  | 0.749396  |
| 12               | 1                | 0              | -0.716535               | 1.769322  | 0.070476  |
| 13               | 1                | 0              | -2.690517               | 0.639234  | -0.036962 |
| 14               | 6                | 0              | 1.788431                | 0.257178  | -0.248020 |
| 15               | 8                | 0              | 0.911494                | 0.888131  | -0.876828 |
| 16               | 8                | 0              | 3.002567                | 0.206461  | -0.399474 |

## Standard orientation of Ts-G-c''

Cartesian coordinates of all the transition states optimized at the M05/6-311+G(d) level:

Standard orientation of transition state of Ts-G-c''

State = 1-A

Charge = -1 Multiplicity = 1

Lowest Harmonic Vibrational Frequency (LHVF) = -484.26 cm<sup>-1</sup>

Standard orientation:

| Center<br>Number | Atomic<br>Number | Atomic<br>Type | Coordinates (Angstroms) |           |           |
|------------------|------------------|----------------|-------------------------|-----------|-----------|
|                  |                  |                | X                       | Y         | Z         |
| 1                | 7                | 0              | 0.038025                | -0.996069 | -0.749872 |
| 2                | 6                | 0              | -0.466014               | -0.936319 | 0.481770  |
| 3                | 1                | 0              | -0.032195               | -0.270492 | 1.236766  |
| 4                | 1                | 0              | -0.871641               | -1.866346 | 0.878962  |
| 5                | 8                | 0              | 1.991123                | -1.484745 | -0.653556 |
| 6                | 1                | 0              | 1.805846                | -2.333691 | -0.246636 |
| 7                | 1                | 0              | 0.432001                | -0.090917 | -0.993477 |
| 8                | 8                | 0              | 2.518363                | 0.419597  | 1.061933  |
| 9                | 1                | 0              | 3.446373                | 0.650803  | 1.018932  |
| 10               | 1                | 0              | 2.383855                | -0.372577 | 0.458269  |
| 11               | 8                | 0              | 1.019232                | 1.981715  | -0.655401 |
| 12               | 1                | 0              | 0.114241                | 1.939761  | -0.329194 |
| 13               | 1                | 0              | 1.573925                | 1.543040  | 0.017366  |
| 14               | 6                | 0              | -2.081826               | 0.129969  | 0.132725  |
| 15               | 8                | 0              | -1.744154               | 1.263305  | -0.082385 |
| 16               | 8                | 0              | -3.013507               | -0.603496 | 0.269553  |

## Standard orientation of Ts-G-d

Cartesian coordinates of all the transition states optimized at the M05/6-311+G(d) level:

Standard orientation of transition state of Ts-G-d

State = 1-A

Charge = -1 Multiplicity = 1

Lowest Harmonic Vibrational Frequency (LHVF) = -670.10 cm<sup>-1</sup>

Standard orientation:

| Center<br>Number | Atomic<br>Number | Atomic<br>Type | Coordinates (Angstroms) |           |           |
|------------------|------------------|----------------|-------------------------|-----------|-----------|
|                  |                  |                | X                       | Y         | Z         |
| 1                | 7                | 0              | 0.049926                | 1.184448  | -0.352330 |
| 2                | 6                | 0              | 1.433287                | 0.896996  | 0.025817  |
| 3                | 1                | 0              | 1.609465                | 1.351650  | 0.997326  |
| 4                | 1                | 0              | 2.045261                | 1.417199  | -0.717252 |
| 5                | 8                | 0              | -0.837538               | 0.249643  | 1.449993  |
| 6                | 1                | 0              | -0.273229               | -0.336160 | 1.963016  |
| 7                | 1                | 0              | -0.574728               | 0.418887  | -0.830313 |
| 8                | 8                | 0              | -0.356828               | 2.295411  | -0.320262 |
| 9                | 8                | 0              | -2.777506               | -0.966869 | 0.680931  |
| 10               | 1                | 0              | -3.609070               | -0.522014 | 0.856536  |
| 11               | 1                | 0              | -1.821142               | -0.343497 | 1.149493  |
| 12               | 8                | 0              | -1.516946               | -0.568870 | -1.510620 |
| 13               | 1                | 0              | -0.843776               | -1.260633 | -1.562364 |
| 14               | 1                | 0              | -2.140848               | -0.802976 | -0.749768 |
| 15               | 6                | 0              | 1.750810                | -0.604913 | -0.028218 |
| 16               | 8                | 0              | 1.113867                | -1.270151 | -0.873402 |
| 17               | 8                | 0              | 2.644200                | -0.984924 | 0.745114  |

## Standard orientation of Ts-G-d'

Cartesian coordinates of all the transition states optimized at the M05/6-311+G(d) level:

Standard orientation of transition state of Ts-G-d'

State = 1-A

Charge = -1 Multiplicity = 1

Lowest Harmonic Vibrational Frequency (LHVF) = -665.45 cm<sup>-1</sup>

Standard orientation:

| Center<br>Number | Atomic<br>Number | Atomic<br>Type | Coordinates (Angstroms) |           |           |
|------------------|------------------|----------------|-------------------------|-----------|-----------|
|                  |                  |                | X                       | Y         | Z         |
| 1                | 7                | 0              | 0.290014                | -0.483110 | 0.070542  |
| 2                | 1                | 0              | 0.685584                | 0.544662  | 0.000758  |
| 3                | 6                | 0              | -0.957824               | -0.656774 | -0.697963 |
| 4                | 1                | 0              | -0.732022               | -0.379430 | -1.725017 |
| 5                | 1                | 0              | -1.207170               | -1.717675 | -0.657961 |
| 6                | 8                | 0              | 1.230710                | -1.339045 | -0.409176 |
| 7                | 8                | 0              | 1.565824                | 1.745931  | -0.002543 |
| 8                | 1                | 0              | 2.547637                | 1.040397  | -0.123699 |
| 9                | 1                | 0              | 1.453274                | 2.333446  | -0.752786 |
| 10               | 8                | 0              | 3.276353                | 0.078320  | -0.165777 |
| 11               | 1                | 0              | 2.157018                | -0.846246 | -0.314625 |
| 12               | 1                | 0              | 3.846117                | 0.107758  | -0.937348 |
| 13               | 6                | 0              | -2.125955               | 0.183463  | -0.154791 |
| 14               | 8                | 0              | -2.025867               | 0.598152  | 1.032741  |
| 15               | 8                | 0              | -3.068311               | 0.347336  | -0.934570 |
| 16               | 8                | 0              | 0.078980                | -0.762436 | 1.420159  |
| 17               | 1                | 0              | -0.739361               | -0.207348 | 1.606743  |

## Standard orientation of Ts-G-e

Cartesian coordinates of all the transition states optimized at the M05-2X/6-311+G(d) level:

Standard orientation of transition state of Ts-G-e

State = 1-A

Charge = -1 Multiplicity = 1

Lowest Harmonic Vibrational Frequency (LHVF) = -527.85 cm<sup>-1</sup>

Standard orientation:

| Center<br>Number | Atomic<br>Number | Atomic<br>Type | Coordinates (Angstroms) |           |           |
|------------------|------------------|----------------|-------------------------|-----------|-----------|
|                  |                  |                | X                       | Y         | Z         |
| 1                | 7                | 0              | 1.336226                | -0.469881 | -0.424100 |
| 2                | 8                | 0              | 2.023364                | 0.551262  | -0.152182 |
| 3                | 6                | 0              | 0.536621                | -0.930854 | 0.528966  |
| 4                | 1                | 0              | 0.667892                | -0.568376 | 1.550696  |
| 5                | 1                | 0              | 0.127465                | -1.920056 | 0.364223  |
| 6                | 6                | 0              | -1.166580               | 0.204750  | 0.000652  |
| 7                | 8                | 0              | -0.854634               | 1.325571  | 0.210361  |
| 8                | 8                | 0              | -1.964878               | -0.610055 | -0.323670 |

## Standard orientation of Ts-G-e'

Cartesian coordinates of all the transition states optimized at the M05-2X/6-311G(d) level:

Standard orientation of transition state of Ts-G-e'

State = 1-A

Charge = -1 Multiplicity = 1

Lowest Harmonic Vibrational Frequency (LHVF) = -282.31 cm<sup>-1</sup>

Standard orientation:

| Center<br>Number | Atomic<br>Number | Atomic<br>Type | Coordinates (Angstroms) |           |           |
|------------------|------------------|----------------|-------------------------|-----------|-----------|
|                  |                  |                | X                       | Y         | Z         |
| 1                | 7                | 0              | -0.248068               | 0.234486  | -0.492454 |
| 2                | 6                | 0              | 0.697138                | -0.596689 | 0.221353  |
| 3                | 6                | 0              | 2.164671                | -0.055811 | 0.044974  |
| 4                | 8                | 0              | -0.643497               | 1.194895  | 0.100011  |
| 5                | 8                | 0              | -2.559317               | -0.029779 | -0.217378 |
| 6                | 8                | 0              | -1.742392               | -0.777273 | -0.846891 |
| 7                | 8                | 0              | -2.433162               | -0.053873 | 1.040794  |
| 8                | 1                | 0              | 0.446458                | -0.600622 | 1.261567  |
| 9                | 8                | 0              | 2.282996                | 1.149507  | -0.215757 |
| 10               | 8                | 0              | 3.029920                | -0.924706 | 0.232346  |
| 11               | 1                | 0              | 0.642762                | -1.595949 | -0.157357 |



## Standard orientation of Ts-G-g

Cartesian coordinates of all the transition states optimized at the M05-2X/6-311+G(d) level:

Standard orientation of transition state of Ts-G-g

State = 1-A

Charge = -1 Multiplicity = 1

Lowest Harmonic Vibrational Frequency (LHVF) = -426.43 cm<sup>-1</sup>

Standard orientation:

| Center<br>Number | Atomic<br>Number | Atomic<br>Type | Coordinates (Angstroms) |           |           |
|------------------|------------------|----------------|-------------------------|-----------|-----------|
|                  |                  |                | X                       | Y         | Z         |
| 1                | 7                | 0              | -1.309310               | -0.155844 | -0.025756 |
| 2                | 8                | 0              | -1.768486               | 0.010339  | 1.098655  |
| 3                | 8                | 0              | -1.767649               | 0.365634  | -1.015933 |
| 4                | 6                | 0              | -0.078466               | -0.947184 | -0.146399 |
| 5                | 1                | 0              | -0.092044               | -1.414602 | -1.126918 |
| 6                | 1                | 0              | -0.088670               | -1.691500 | 0.643870  |
| 7                | 6                | 0              | 1.425316                | 0.118644  | 0.012190  |
| 8                | 8                | 0              | 1.238128                | 1.332440  | 0.129349  |
| 9                | 8                | 0              | 2.456105                | -0.562382 | -0.028496 |

## Standard orientation of Ts-G-h

Cartesian coordinates of all the transition states optimized at the M05/6-311G(d) level:

Standard orientation of transition state of Ts-G-h

State = 1-A

Charge = -1 Multiplicity = 1

Lowest Harmonic Vibrational Frequency (LHVF) = -623.80 cm<sup>-1</sup>

Standard orientation:

| Center<br>Number | Atomic<br>Number | Atomic<br>Type | Coordinates (Angstroms) |           |           |
|------------------|------------------|----------------|-------------------------|-----------|-----------|
|                  |                  |                | X                       | Y         | Z         |
| 1                | 7                | 0              | -0.255889               | 1.063519  | -0.075934 |
| 2                | 6                | 0              | 0.888657                | 0.495629  | -0.793866 |
| 3                | 1                | 0              | 0.508226                | 0.102754  | -1.736852 |
| 4                | 1                | 0              | 1.607390                | 1.296302  | -1.013937 |
| 5                | 8                | 0              | -0.743676               | 2.102571  | -0.841280 |
| 6                | 1                | 0              | -1.705444               | 2.119444  | -0.648933 |
| 7                | 6                | 0              | 1.596907                | -0.633712 | -0.008767 |
| 8                | 8                | 0              | 1.367564                | -0.704292 | 1.227936  |
| 9                | 8                | 0              | 2.346382                | -1.353888 | -0.683114 |
| 10               | 8                | 0              | 0.255188                | 1.678513  | 1.107751  |
| 11               | 8                | 0              | -1.260221               | -1.190539 | -0.278621 |
| 12               | 8                | 0              | -2.167823               | -2.081457 | 0.074823  |
| 13               | 8                | 0              | -1.506444               | -0.045406 | 0.330021  |
| 14               | 1                | 0              | 0.139906                | 2.621348  | 1.246931  |

## Standard orientation of Ts-G-h'

Cartesian coordinates of all the transition states optimized at the M05/6-311+G(d) level:

Standard orientation of transition state of Ts-G-h'

State = 1-A

Charge = -1 Multiplicity = 1

Lowest Harmonic Vibrational Frequency (LHVF) = -966.87 cm<sup>-1</sup>

Standard orientation:

| Center<br>Number | Atomic<br>Number | Atomic<br>Type | Coordinates (Angstroms) |           |           |
|------------------|------------------|----------------|-------------------------|-----------|-----------|
|                  |                  |                | X                       | Y         | Z         |
| 1                | 7                | 0              | 0.145838                | -0.501735 | -0.099953 |
| 2                | 8                | 0              | 0.958108                | -1.488829 | 0.261875  |
| 3                | 1                | 0              | 2.261659                | -1.086690 | -0.345068 |
| 4                | 6                | 0              | -2.293530               | 0.147901  | -0.255974 |
| 5                | 8                | 0              | -2.021545               | 1.018865  | -1.108217 |
| 6                | 8                | 0              | -3.378449               | 0.013025  | 0.358910  |
| 7                | 8                | 0              | 0.271172                | 0.573738  | 1.005129  |
| 8                | 1                | 0              | 0.457182                | 0.058181  | 1.807334  |
| 9                | 6                | 0              | -1.242951               | -0.925511 | 0.053977  |
| 10               | 1                | 0              | -1.396050               | -1.340256 | 1.055632  |
| 11               | 1                | 0              | -1.372108               | -1.740290 | -0.662590 |
| 12               | 8                | 0              | 3.084589                | -0.578231 | -0.729186 |
| 13               | 1                | 0              | 1.321190                | 1.201385  | 0.608461  |
| 14               | 1                | 0              | 3.888853                | -0.958935 | -0.368212 |
| 15               | 8                | 0              | 2.267529                | 1.610283  | 0.126825  |
| 16               | 1                | 0              | 2.759522                | 0.776611  | -0.263667 |
| 17               | 1                | 0              | 2.826551                | 2.076999  | 0.757081  |

## Standard orientation of Ts-G-h''

Cartesian coordinates of all the transition states optimized at the M05/6-311+G(d) level:

Standard orientation of transition state of Ts-G-h''

State = 1-A

Charge = -1 Multiplicity = 1

Lowest Harmonic Vibrational Frequency (LHVF) = -304.83 cm<sup>-1</sup>

Standard orientation:

| Center<br>Number | Atomic<br>Number | Atomic<br>Type | Coordinates (Angstroms) |           |           |
|------------------|------------------|----------------|-------------------------|-----------|-----------|
|                  |                  |                | X                       | Y         | Z         |
| 1                | 7                | 0              | 0.118638                | -1.269917 | 0.410670  |
| 2                | 6                | 0              | 0.575490                | -0.846505 | -0.768823 |
| 3                | 1                | 0              | 0.088431                | -0.026262 | -1.307286 |
| 4                | 1                | 0              | 1.002741                | -1.615368 | -1.409343 |
| 5                | 8                | 0              | -1.824050               | -1.783390 | 0.276380  |
| 6                | 1                | 0              | -1.685894               | -2.596038 | -0.217592 |
| 7                | 8                | 0              | -2.599855               | 0.488824  | -0.842475 |
| 8                | 1                | 0              | -3.535608               | 0.629192  | -0.688893 |
| 9                | 1                | 0              | -2.373468               | -0.411887 | -0.480703 |
| 10               | 8                | 0              | -0.918896               | 2.520307  | 0.108208  |
| 11               | 1                | 0              | -0.048329               | 2.120482  | 0.220988  |
| 12               | 1                | 0              | -1.511811               | 1.821636  | -0.224281 |
| 13               | 6                | 0              | 2.083810                | 0.152456  | -0.137398 |
| 14               | 8                | 0              | 1.680848                | 1.148284  | 0.410517  |
| 15               | 8                | 0              | 3.073166                | -0.427838 | -0.481690 |
| 16               | 8                | 0              | -0.413298               | -0.235889 | 1.115958  |
| 17               | 1                | 0              | -0.705642               | -0.550436 | 1.974559  |

## Standard orientation of Ts-G-i

Cartesian coordinates of all the transition states optimized at the M05/6-311+G(d) level:

Standard orientation of transition state of Ts-G-i

State = 1-A

Charge = -1 Multiplicity = 1

Lowest Harmonic Vibrational Frequency (LHVF) = -606.17 cm<sup>-1</sup>

Standard orientation:

| Center<br>Number | Atomic<br>Number | Atomic<br>Type | Coordinates (Angstroms) |           |           |
|------------------|------------------|----------------|-------------------------|-----------|-----------|
|                  |                  |                | X                       | Y         | Z         |
| 1                | 7                | 0              | -0.008701               | -0.740430 | -0.373397 |
| 2                | 8                | 0              | 0.297918                | -0.773731 | 0.874694  |
| 3                | 1                | 0              | 1.663321                | -0.799205 | 1.056125  |
| 4                | 8                | 0              | 0.415512                | 0.985623  | -0.888217 |
| 5                | 1                | 0              | -0.190014               | 1.478775  | -0.304962 |
| 6                | 8                | 0              | 2.735521                | -0.649304 | 1.146258  |
| 7                | 1                | 0              | 1.852050                | 1.198671  | -0.664993 |
| 8                | 1                | 0              | 2.980861                | -0.451562 | 2.056974  |
| 9                | 8                | 0              | 2.876088                | 1.190711  | -0.454196 |
| 10               | 1                | 0              | 2.943998                | 0.183596  | 0.498695  |
| 11               | 1                | 0              | 3.154621                | 2.059742  | -0.154627 |
| 12               | 8                | 0              | 0.633459                | -1.425314 | -1.165874 |
| 13               | 6                | 0              | -1.478650               | -0.653824 | -0.614918 |
| 14               | 1                | 0              | -1.590302               | -0.421342 | -1.670977 |
| 15               | 6                | 0              | -2.295464               | 0.332218  | 0.241697  |
| 16               | 8                | 0              | -3.457569               | -0.058533 | 0.464309  |
| 17               | 8                | 0              | -1.785560               | 1.422005  | 0.581608  |
| 18               | 1                | 0              | -1.831883               | -1.667693 | -0.431794 |

## Standard orientation of Ts-S-a

Cartesian coordinates of all the transition states optimized at the M05/6-311G(d) level:

Standard orientation of transition state of Ts-S-a

State = 1-A

Charge = -1 Multiplicity = 1

Lowest Harmonic Vibrational Frequency (LHVF) = -513.09 cm<sup>-1</sup>

Standard orientation:

| Center<br>Number | Atomic<br>Number | Atomic<br>Type | Coordinates (Angstroms) |           |           |
|------------------|------------------|----------------|-------------------------|-----------|-----------|
|                  |                  |                | X                       | Y         | Z         |
| 1                | 7                | 0              | 0.443043                | 0.409829  | 0.331420  |
| 2                | 6                | 0              | -0.840831               | 0.136933  | -0.297031 |
| 3                | 8                | 0              | 2.792395                | 0.504139  | -0.154095 |
| 4                | 8                | 0              | 1.627988                | 0.533727  | -0.794565 |
| 5                | 8                | 0              | 3.082148                | -0.733319 | 0.300792  |
| 6                | 1                | 0              | 0.489179                | 1.286844  | 0.838414  |
| 7                | 1                | 0              | -0.720921               | 0.317697  | -1.369783 |
| 8                | 1                | 0              | 0.749302                | -0.417568 | 0.855842  |
| 9                | 6                | 0              | -1.231657               | -1.355312 | -0.056988 |
| 10               | 8                | 0              | -0.454262               | -1.996321 | 0.679131  |
| 11               | 8                | 0              | -2.279000               | -1.713114 | -0.613169 |
| 12               | 6                | 0              | -1.889039               | 1.084737  | 0.250749  |
| 13               | 1                | 0              | -2.810715               | 0.935857  | -0.318094 |
| 14               | 1                | 0              | -2.092886               | 0.844132  | 1.302336  |
| 15               | 8                | 0              | -1.393999               | 2.401822  | 0.125668  |
| 16               | 1                | 0              | -1.948261               | 2.990628  | 0.640871  |

## Standard orientation of Ts-S-b

Cartesian coordinates of all the transition states optimized at the M05/6-311+G(d) level:

Standard orientation of transition state of Ts-S-b

State = 1-A

Charge = -1 Multiplicity = 1

Lowest Harmonic Vibrational Frequency (LHVF) = -622.95 cm<sup>-1</sup>

Standard orientation:

| Center<br>Number | Atomic<br>Number | Atomic<br>Type | Coordinates (Angstroms) |           |           |
|------------------|------------------|----------------|-------------------------|-----------|-----------|
|                  |                  |                | X                       | Y         | Z         |
| 1                | 7                | 0              | 0.144106                | -0.833054 | -0.243346 |
| 2                | 1                | 0              | 0.752298                | -0.705020 | 0.639117  |
| 3                | 1                | 0              | -0.419566               | -1.685082 | -0.117004 |
| 4                | 6                | 0              | -0.857379               | 0.241062  | -0.423790 |
| 5                | 8                | 0              | 0.979450                | -1.016635 | -1.337806 |
| 6                | 8                | 0              | 1.960123                | -0.637377 | 1.650941  |
| 7                | 1                | 0              | 2.688482                | -0.369548 | 0.716796  |
| 8                | 1                | 0              | 1.948288                | 0.068294  | 2.300718  |
| 9                | 8                | 0              | 3.176599                | -0.220574 | -0.378479 |
| 10               | 1                | 0              | 1.909076                | -0.661293 | -1.049950 |
| 11               | 1                | 0              | 3.283371                | 0.720492  | -0.535494 |
| 12               | 6                | 0              | -2.231941               | -0.296598 | 0.053885  |
| 13               | 8                | 0              | -2.274365               | -1.525358 | 0.292309  |
| 14               | 8                | 0              | -3.148518               | 0.535832  | 0.124998  |
| 15               | 1                | 0              | -0.918001               | 0.411584  | -1.500696 |
| 16               | 6                | 0              | -0.454022               | 1.518822  | 0.266905  |
| 17               | 1                | 0              | -1.264285               | 2.239896  | 0.143413  |
| 18               | 1                | 0              | -0.313278               | 1.343328  | 1.339620  |
| 19               | 8                | 0              | 0.746210                | 1.982394  | -0.324718 |
| 20               | 1                | 0              | 1.068920                | 2.742752  | 0.166936  |

## Standard orientation of Ts-S-c

Cartesian coordinates of all the transition states optimized at the M05/6-311G(d) level:

Standard orientation of transition state of Ts-S-c

State = 1-A

Charge = -1 Multiplicity = 1

Lowest Harmonic Vibrational Frequency (LHVF) = -420.35 cm<sup>-1</sup>

Standard orientation:

| Center<br>Number | Atomic<br>Number | Atomic<br>Type | Coordinates (Angstroms) |           |           |
|------------------|------------------|----------------|-------------------------|-----------|-----------|
|                  |                  |                | X                       | Y         | Z         |
| 1                | 7                | 0              | 0.449230                | 0.155021  | 0.269446  |
| 2                | 6                | 0              | -0.874042               | 0.037650  | -0.376201 |
| 3                | 8                | 0              | 2.759385                | 0.180437  | -0.313089 |
| 4                | 8                | 0              | 1.584671                | 0.367969  | -0.911600 |
| 5                | 8                | 0              | 2.921745                | -1.122770 | 0.029094  |
| 6                | 1                | 0              | 0.743828                | -0.770127 | 0.613822  |
| 7                | 6                | 0              | -1.464413               | -1.376739 | -0.027276 |
| 8                | 8                | 0              | -0.686345               | -2.136366 | 0.580261  |
| 9                | 8                | 0              | -2.624825               | -1.554469 | -0.413342 |
| 10               | 8                | 0              | 0.624644                | 1.049601  | 1.254215  |
| 11               | 1                | 0              | 0.266300                | 1.889642  | 0.894148  |
| 12               | 1                | 0              | -0.676713               | 0.077985  | -1.450531 |
| 13               | 6                | 0              | -1.790686               | 1.168855  | 0.015114  |
| 14               | 1                | 0              | -2.703091               | 1.080120  | -0.574813 |
| 15               | 1                | 0              | -2.057410               | 1.098548  | 1.075108  |
| 16               | 8                | 0              | -1.113919               | 2.394921  | -0.245415 |
| 17               | 1                | 0              | -1.665531               | 3.125492  | 0.045332  |



## Standard orientation of Ts-S-c'

Cartesian coordinates of all the transition states optimized at the M05/6-311+G(d) level:

Standard orientation of transition state of Ts-S-c'

State = 1-A

Charge = -1 Multiplicity = 1

Lowest Harmonic Vibrational Frequency (LHVF) = -377.03 cm<sup>-1</sup>

Standard orientation:

| Center<br>Number | Atomic<br>Number | Atomic<br>Type | Coordinates (Angstroms) |           |           |
|------------------|------------------|----------------|-------------------------|-----------|-----------|
|                  |                  |                | X                       | Y         | Z         |
| 1                | 7                | 0              | -0.267807               | -1.127604 | 0.197273  |
| 2                | 6                | 0              | 0.952192                | -0.447568 | -0.286983 |
| 3                | 1                | 0              | 1.076753                | -0.742549 | -1.329303 |
| 4                | 8                | 0              | -1.563320               | -0.365358 | -1.466552 |
| 5                | 1                | 0              | -1.261442               | 0.539185  | -1.290702 |
| 6                | 1                | 0              | -1.222805               | -0.400305 | 0.921966  |
| 7                | 8                | 0              | -3.741979               | -0.384844 | -0.214170 |
| 8                | 1                | 0              | -3.989926               | -1.294437 | -0.043673 |
| 9                | 1                | 0              | -2.518007               | -0.419985 | -1.025781 |
| 10               | 8                | 0              | -2.091971               | 0.248124  | 1.588621  |
| 11               | 1                | 0              | -1.736453               | 1.100536  | 1.315194  |
| 12               | 1                | 0              | -3.081222               | -0.066671 | 0.657316  |
| 13               | 6                | 0              | 0.935323                | 1.097152  | -0.144907 |
| 14               | 8                | 0              | -0.189737               | 1.651529  | -0.113602 |
| 15               | 8                | 0              | 2.059621                | 1.602243  | -0.113263 |
| 16               | 6                | 0              | 2.102094                | -1.081409 | 0.517736  |
| 17               | 1                | 0              | 1.984087                | -2.144795 | 0.531336  |
| 18               | 1                | 0              | 2.084201                | -0.707718 | 1.520200  |
| 19               | 8                | 0              | 3.351480                | -0.748235 | -0.092944 |
| 20               | 1                | 0              | 4.009061                | -1.406751 | 0.142733  |

## Standard orientation of Ts-S-c''

Cartesian coordinates of all the transition states optimized at the M05/6-311+G(d) level:

Standard orientation of transition state of Ts-S-c''

State = 1-A

Charge = -1 Multiplicity = 1

Lowest Harmonic Vibrational Frequency (LHVF) = -363.74 cm<sup>-1</sup>

Standard orientation:

| Center<br>Number | Atomic<br>Number | Atomic<br>Type | Coordinates (Angstroms) |           |           |
|------------------|------------------|----------------|-------------------------|-----------|-----------|
|                  |                  |                | X                       | Y         | Z         |
| 1                | 7                | 0              | -0.341132               | 0.068994  | 1.311642  |
| 2                | 1                | 0              | 1.866519                | 1.780469  | -1.792636 |
| 3                | 6                | 0              | -0.697909               | 0.202511  | -0.033039 |
| 4                | 1                | 0              | 0.234372                | 0.505695  | -0.584993 |
| 5                | 8                | 0              | 1.993089                | -0.207560 | 1.492742  |
| 6                | 8                | 0              | 1.587761                | 0.861691  | -1.796041 |
| 7                | 1                | 0              | 2.281169                | 0.617901  | 1.890649  |
| 8                | 1                | 0              | 2.353235                | 0.320199  | -1.360372 |
| 9                | 8                | 0              | -0.511372               | -1.095506 | 1.724556  |
| 10               | 1                | 0              | -0.208784               | -1.130166 | 2.655785  |
| 11               | 8                | 0              | 3.287232                | -0.556625 | -0.595042 |
| 12               | 1                | 0              | 2.595649                | -0.349209 | 0.632108  |
| 13               | 1                | 0              | 4.202060                | -0.270215 | -0.573552 |
| 14               | 6                | 0              | -1.322772               | -1.067378 | -0.640104 |
| 15               | 8                | 0              | -0.799219               | -2.135687 | -0.953422 |
| 16               | 8                | 0              | -2.658470               | -0.938100 | -0.841620 |
| 17               | 6                | 0              | -1.585331               | 1.458492  | -0.114237 |
| 18               | 1                | 0              | -1.871962               | 1.627549  | -1.131175 |
| 19               | 1                | 0              | -2.460859               | 1.315885  | 0.484106  |
| 20               | 8                | 0              | -0.856201               | 2.589413  | 0.369797  |
| 21               | 1                | 0              | -1.309943               | 3.396163  | 0.115096  |

## Standard orientation of Ts-S-d

Cartesian coordinates of all the transition states optimized at the M05/6-311+G(d) level:

Standard orientation of transition state of Ts-S-d

State = 1-A

Charge = -1 Multiplicity = 1

Lowest Harmonic Vibrational Frequency (LHVF) = -611.81 cm<sup>-1</sup>

Standard orientation:

| Center<br>Number | Atomic<br>Number | Atomic<br>Type | Coordinates (Angstroms) |           |           |
|------------------|------------------|----------------|-------------------------|-----------|-----------|
|                  |                  |                | X                       | Y         | Z         |
| 1                | 7                | 0              | 0.157299                | -0.882471 | -0.203066 |
| 2                | 6                | 0              | 1.110622                | 0.203730  | -0.400283 |
| 3                | 1                | 0              | 1.385909                | 0.201105  | -1.453037 |
| 4                | 8                | 0              | -1.479858               | 0.005187  | -1.411939 |
| 5                | 1                | 0              | -1.371335               | 0.931277  | -1.648091 |
| 6                | 1                | 0              | -0.607624               | -0.807067 | 0.582110  |
| 7                | 8                | 0              | 0.324574                | -1.931502 | -0.730922 |
| 8                | 8                | 0              | -3.492909               | -0.303927 | -0.114682 |
| 9                | 1                | 0              | -4.046524               | -1.020168 | -0.432078 |
| 10               | 1                | 0              | -2.520973               | -0.135421 | -0.839614 |
| 11               | 8                | 0              | -1.685244               | -0.708952 | 1.654374  |
| 12               | 1                | 0              | -1.413277               | 0.173829  | 1.941636  |
| 13               | 1                | 0              | -2.514449               | -0.596946 | 1.086780  |
| 14               | 6                | 0              | 0.484157                | 1.539654  | 0.058747  |
| 15               | 8                | 0              | -0.038549               | 1.514444  | 1.194098  |
| 16               | 8                | 0              | 0.602542                | 2.493294  | -0.725010 |
| 17               | 6                | 0              | 2.346919                | -0.091324 | 0.465290  |
| 18               | 1                | 0              | 2.054695                | -0.192005 | 1.512849  |
| 19               | 1                | 0              | 2.992280                | 0.784097  | 0.379416  |
| 20               | 8                | 0              | 3.077154                | -1.203406 | 0.015223  |
| 21               | 1                | 0              | 2.828325                | -1.994863 | 0.499825  |

## Standard orientation of Ts-S-d'

Cartesian coordinates of all the transition states optimized at the M05/6-311+G(d) level:

Standard orientation of transition state of Ts-S-d'

State = 1-A

Charge = -1 Multiplicity = 1

Lowest Harmonic Vibrational Frequency (LHVF) = -652.85 cm<sup>-1</sup>

Standard orientation:

| Center<br>Number | Atomic<br>Number | Atomic<br>Type | Coordinates (Angstroms) |           |           |
|------------------|------------------|----------------|-------------------------|-----------|-----------|
|                  |                  |                | X                       | Y         | Z         |
| 1                | 7                | 0              | 0.434667                | -0.243524 | -0.531825 |
| 2                | 1                | 0              | 0.862492                | -0.627616 | 0.408724  |
| 3                | 6                | 0              | -0.924839               | 0.331111  | -0.330863 |
| 4                | 8                | 0              | 1.270111                | 0.701718  | -1.031322 |
| 5                | 8                | 0              | 1.799314                | -1.091682 | 1.480386  |
| 6                | 1                | 0              | 2.719138                | -0.499469 | 0.954494  |
| 7                | 1                | 0              | 1.622704                | -0.769991 | 2.366885  |
| 8                | 8                | 0              | 3.391128                | 0.110859  | 0.157567  |
| 9                | 1                | 0              | 2.217627                | 0.514394  | -0.614706 |
| 10               | 1                | 0              | 3.838332                | 0.849896  | 0.575478  |
| 11               | 6                | 0              | -1.921873               | -0.763979 | 0.147744  |
| 12               | 8                | 0              | -1.554041               | -1.963207 | 0.018773  |
| 13               | 8                | 0              | -3.001708               | -0.354044 | 0.577770  |
| 14               | 8                | 0              | 0.390965                | -1.305264 | -1.434333 |
| 15               | 1                | 0              | -0.311210               | -1.883085 | -1.008056 |
| 16               | 1                | 0              | -1.248347               | 0.666975  | -1.318835 |
| 17               | 6                | 0              | -0.856818               | 1.522120  | 0.605189  |
| 18               | 1                | 0              | -1.757810               | 1.516648  | 1.219581  |
| 19               | 1                | 0              | 0.012768                | 1.433761  | 1.266327  |
| 20               | 8                | 0              | -0.788722               | 2.714271  | -0.156409 |
| 21               | 1                | 0              | -0.833573               | 3.466439  | 0.441005  |

## Standard orientation of Ts-S-e

Cartesian coordinates of all the transition states optimized at the M05-2X/6-311+G(d) level:

Standard orientation of transition state of Ts-S-e

State = 1-A

Charge = -1 Multiplicity = 1

Lowest Harmonic Vibrational Frequency (LHVF) = -322.02 cm<sup>-1</sup>

Standard orientation:

| Center<br>Number | Atomic<br>Number | Atomic<br>Type | Coordinates (Angstroms) |           |           |
|------------------|------------------|----------------|-------------------------|-----------|-----------|
|                  |                  |                | X                       | Y         | Z         |
| 1                | 7                | 0              | 0.110213                | 1.237906  | -0.553408 |
| 2                | 8                | 0              | -0.513233               | 2.235693  | -0.116607 |
| 3                | 6                | 0              | 0.388336                | 0.262135  | 0.311743  |
| 4                | 1                | 0              | 0.262815                | 0.484320  | 1.375023  |
| 5                | 6                | 0              | -1.444871               | -0.777389 | 0.049205  |
| 6                | 8                | 0              | -2.265926               | -0.028455 | 0.451606  |
| 7                | 8                | 0              | -1.126807               | -1.830690 | -0.394306 |
| 8                | 6                | 0              | 1.442935                | -0.708737 | -0.089246 |
| 9                | 1                | 0              | 1.296546                | -1.664248 | 0.421876  |
| 10               | 1                | 0              | 1.380648                | -0.885701 | -1.167628 |
| 11               | 8                | 0              | 2.727882                | -0.177121 | 0.250101  |
| 12               | 1                | 0              | 3.394773                | -0.851187 | 0.088014  |

## Standard orientation of Ts-S-e'

Cartesian coordinates of all the transition states optimized at the M05-2X/6-311G(d) level:

Standard orientation of transition state of Ts-S-e'

State = 1-A

Charge = -1 Multiplicity = 1

Lowest Harmonic Vibrational Frequency (LHVF) = -289.77 cm<sup>-1</sup>

Standard orientation:

| Center<br>Number | Atomic<br>Number | Atomic<br>Type | Coordinates (Angstroms) |           |           |
|------------------|------------------|----------------|-------------------------|-----------|-----------|
|                  |                  |                | X                       | Y         | Z         |
| 1                | 7                | 0              | 0.474894                | -0.415159 | -0.521606 |
| 2                | 6                | 0              | -0.519303               | -0.074887 | 0.473168  |
| 3                | 6                | 0              | -1.905955               | -0.735304 | 0.129143  |
| 4                | 8                | 0              | 1.045320                | -1.451936 | -0.349930 |
| 5                | 8                | 0              | 2.740735                | 0.089573  | -0.207627 |
| 6                | 8                | 0              | 1.781144                | 0.878997  | -0.487620 |
| 7                | 8                | 0              | 2.709987                | -0.381616 | 0.965629  |
| 8                | 1                | 0              | -0.200540               | -0.451412 | 1.448352  |
| 9                | 8                | 0              | -1.874314               | -1.756361 | -0.571723 |
| 10               | 8                | 0              | -2.867149               | -0.149929 | 0.650858  |
| 11               | 6                | 0              | -0.667664               | 1.457747  | 0.498149  |
| 12               | 1                | 0              | -1.245301               | 1.746304  | 1.351360  |
| 13               | 1                | 0              | 0.300928                | 1.908979  | 0.554003  |
| 14               | 8                | 0              | -1.327918               | 1.892215  | -0.693573 |
| 15               | 1                | 0              | -1.284258               | 2.849357  | -0.753343 |

## Standard orientation of Ts-S-g

Cartesian coordinates of all the transition states optimized at the M05-2X/6-311+G(d) level:

Standard orientation of transition state of Ts-S-g

State = 1-A

Charge = -1 Multiplicity = 1

Lowest Harmonic Vibrational Frequency (LHVF) = -379.14 cm<sup>-1</sup>

Standard orientation:

| Center<br>Number | Atomic<br>Number | Atomic<br>Type | Coordinates (Angstroms) |           |           |
|------------------|------------------|----------------|-------------------------|-----------|-----------|
|                  |                  |                | X                       | Y         | Z         |
| 1                | 7                | 0              | -0.492620               | 1.157458  | -0.089675 |
| 2                | 8                | 0              | -0.907027               | 1.436201  | 1.052288  |
| 3                | 8                | 0              | -0.155136               | 2.065953  | -0.875321 |
| 4                | 6                | 0              | -0.303898               | -0.156726 | -0.468133 |
| 5                | 1                | 0              | -0.183451               | -0.241799 | -1.542749 |
| 6                | 6                | 0              | 1.831528                | -0.539317 | 0.054301  |
| 7                | 8                | 0              | 1.917138                | -1.692630 | -0.193170 |
| 8                | 8                | 0              | 2.253666                | 0.503761  | 0.411372  |
| 9                | 6                | 0              | -1.064594               | -1.214709 | 0.235580  |
| 10               | 1                | 0              | -0.611341               | -2.181940 | -0.003630 |
| 11               | 1                | 0              | -1.013980               | -1.071019 | 1.319296  |
| 12               | 8                | 0              | -2.436830               | -1.215081 | -0.187744 |
| 13               | 1                | 0              | -2.895595               | -1.928554 | 0.264911  |

## Standard orientation of Ts-S-h

Cartesian coordinates of all the transition states optimized at the M05/6-311G(d) level:

Standard orientation of transition state of Ts-S-h

State = 1-A

Charge = -1 Multiplicity = 1

Lowest Harmonic Vibrational Frequency (LHVF) = -654.60 cm<sup>-1</sup>

Standard orientation:

| Center<br>Number | Atomic<br>Number | Atomic<br>Type | Coordinates (Angstroms) |           |           |
|------------------|------------------|----------------|-------------------------|-----------|-----------|
|                  |                  |                | X                       | Y         | Z         |
| 1                | 7                | 0              | 0.625918                | -0.457824 | 0.586104  |
| 2                | 6                | 0              | -0.586999               | -0.094892 | -0.221140 |
| 3                | 1                | 0              | -0.207902               | -0.095932 | -1.238654 |
| 4                | 8                | 0              | 1.190618                | -1.614559 | 0.183478  |
| 5                | 1                | 0              | 2.031281                | -1.325333 | -0.265310 |
| 6                | 6                | 0              | -1.302766               | 1.254956  | 0.096148  |
| 7                | 8                | 0              | -0.880841               | 1.971568  | 1.008471  |
| 8                | 8                | 0              | -2.261389               | 1.406002  | -0.681107 |
| 9                | 8                | 0              | 0.322815                | -0.513139 | 1.889929  |
| 10               | 8                | 0              | 2.663475                | 0.224247  | -0.564612 |
| 11               | 8                | 0              | 2.259143                | 0.517943  | -1.801097 |
| 12               | 8                | 0              | 1.742931                | 0.653556  | 0.438543  |
| 13               | 1                | 0              | 1.136380                | -0.795656 | 2.338851  |
| 14               | 6                | 0              | -1.550071               | -1.278908 | -0.015713 |
| 15               | 1                | 0              | -1.948700               | -1.246378 | 0.976727  |
| 16               | 1                | 0              | -1.020771               | -2.197945 | -0.157528 |
| 17               | 8                | 0              | -2.618989               | -1.193578 | -0.961775 |
| 18               | 1                | 0              | -3.074807               | -2.037239 | -1.007234 |



## Standard orientation of Ts-S-h'

Cartesian coordinates of all the transition states optimized at the M05/6-311+G(d) level:

Standard orientation of transition state of Ts-S-h'

State = 1-A

Charge = -1 Multiplicity = 1

Lowest Harmonic Vibrational Frequency (LHVF) = -1001.73 cm<sup>-1</sup>

Standard orientation:

| Center<br>Number | Atomic<br>Number | Atomic<br>Type | Coordinates (Angstroms) |           |           |
|------------------|------------------|----------------|-------------------------|-----------|-----------|
|                  |                  |                | X                       | Y         | Z         |
| 1                | 7                | 0              | 0.377811                | 0.159335  | -0.289323 |
| 2                | 8                | 0              | 1.086106                | 0.907812  | -1.118749 |
| 3                | 1                | 0              | 2.332817                | 1.162700  | -0.295619 |
| 4                | 6                | 0              | -1.857474               | -0.850465 | 0.118138  |
| 5                | 8                | 0              | -2.507307               | -1.686337 | -0.534765 |
| 6                | 8                | 0              | -1.839923               | -0.729855 | 1.373714  |
| 7                | 8                | 0              | 0.829255                | -1.316953 | -0.562001 |
| 8                | 1                | 0              | 1.050070                | -1.296510 | -1.507520 |
| 9                | 6                | 0              | -1.044636               | 0.192929  | -0.667351 |
| 10               | 1                | 0              | -1.126765               | -0.004027 | -1.742365 |
| 11               | 8                | 0              | 3.134633                | 1.096013  | 0.356037  |
| 12               | 1                | 0              | 1.823844                | -1.418872 | 0.092362  |
| 13               | 1                | 0              | 3.927527                | 1.393618  | -0.096535 |
| 14               | 8                | 0              | 2.742390                | -1.328656 | 0.763995  |
| 15               | 1                | 0              | 3.065913                | -0.340965 | 0.684062  |
| 16               | 1                | 0              | 3.444282                | -1.945387 | 0.531344  |
| 17               | 6                | 0              | -1.591193               | 1.586069  | -0.383082 |
| 18               | 1                | 0              | -0.994451               | 2.326415  | -0.916846 |
| 19               | 1                | 0              | -2.616430               | 1.632808  | -0.773415 |
| 20               | 8                | 0              | -1.562423               | 1.902154  | 0.993727  |
| 21               | 1                | 0              | -1.653507               | 1.050259  | 1.467895  |

## Standard orientation of Ts-S-h''

Cartesian coordinates of all the transition states optimized at the M05/6-311+G(d) level:

Standard orientation of transition state of Ts-S-h''

State = 1-A

Charge = -1 Multiplicity = 1

Lowest Harmonic Vibrational Frequency (LHVF) = -363.74 cm<sup>-1</sup>

Standard orientation:

| Center<br>Number | Atomic<br>Number | Atomic<br>Type | Coordinates (Angstroms) |           |           |
|------------------|------------------|----------------|-------------------------|-----------|-----------|
|                  |                  |                | X                       | Y         | Z         |
| 1                | 7                | 0              | -0.341132               | 0.068994  | 1.311642  |
| 2                | 1                | 0              | 1.866519                | 1.780469  | -1.792636 |
| 3                | 6                | 0              | -0.697909               | 0.202511  | -0.033039 |
| 4                | 1                | 0              | 0.234372                | 0.505695  | -0.584993 |
| 5                | 8                | 0              | 1.993089                | -0.207560 | 1.492742  |
| 6                | 8                | 0              | 1.587761                | 0.861691  | -1.796041 |
| 7                | 1                | 0              | 2.281169                | 0.617901  | 1.890649  |
| 8                | 1                | 0              | 2.353235                | 0.320199  | -1.360372 |
| 9                | 8                | 0              | -0.511372               | -1.095506 | 1.724556  |
| 10               | 1                | 0              | -0.208784               | -1.130166 | 2.655785  |
| 11               | 8                | 0              | 3.287232                | -0.556625 | -0.595042 |
| 12               | 1                | 0              | 2.595649                | -0.349209 | 0.632108  |
| 13               | 1                | 0              | 4.202060                | -0.270215 | -0.573552 |
| 14               | 6                | 0              | -1.322772               | -1.067378 | -0.640104 |
| 15               | 8                | 0              | -0.799219               | -2.135687 | -0.953422 |
| 16               | 8                | 0              | -2.658470               | -0.938100 | -0.841620 |
| 17               | 6                | 0              | -1.585331               | 1.458492  | -0.114237 |
| 18               | 1                | 0              | -1.871962               | 1.627549  | -1.131175 |
| 19               | 1                | 0              | -2.460859               | 1.315885  | 0.484106  |
| 20               | 8                | 0              | -0.856201               | 2.589413  | 0.369797  |
| 21               | 1                | 0              | -1.309943               | 3.396163  | 0.115096  |

## Standard orientation of Ts-S-i

Cartesian coordinates of all the transition states optimized at the M05/6-311+G(d) level:

Standard orientation of transition state of Ts-S-i

State = 1-A

Charge = -1 Multiplicity = 1

Lowest Harmonic Vibrational Frequency (LHVF) = -631.38 cm<sup>-1</sup>

Standard orientation:

| Center<br>Number | Atomic<br>Number | Atomic<br>Type | Coordinates (Angstroms) |           |           |
|------------------|------------------|----------------|-------------------------|-----------|-----------|
|                  |                  |                | X                       | Y         | Z         |
| 1                | 7                | 0              | -0.492620               | 1.157458  | -0.089675 |
| 2                | 8                | 0              | -0.907027               | 1.436201  | 1.052288  |
| 3                | 8                | 0              | -0.155136               | 2.065953  | -0.875321 |
| 4                | 6                | 0              | -0.303898               | -0.156726 | -0.468133 |
| 5                | 1                | 0              | -0.183451               | -0.241799 | -1.542749 |
| 6                | 6                | 0              | 1.831528                | -0.539317 | 0.054301  |
| 7                | 8                | 0              | 1.917138                | -1.692630 | -0.193170 |
| 8                | 8                | 0              | 2.253666                | 0.503761  | 0.411372  |
| 9                | 6                | 0              | -1.064594               | -1.214709 | 0.235580  |
| 10               | 1                | 0              | -0.611341               | -2.181940 | -0.003630 |
| 11               | 1                | 0              | -1.013980               | -1.071019 | 1.319296  |
| 12               | 8                | 0              | -2.436830               | -1.215081 | -0.187744 |
| 13               | 1                | 0              | -2.895595               | -1.928554 | 0.264911  |

## Standard orientation of Ts-F-a

Cartesian coordinates of all the transition states optimized at the M05/6-311+G(d) level:

Standard orientation of transition state of Ts-F-a

State = 1-A

Charge = 0 Multiplicity = 1

Lowest Harmonic Vibrational Frequency (LHVF) = -546.78 cm<sup>-1</sup>

Standard orientation:

| Center<br>Number | Atomic<br>Number | Atomic<br>Type | Coordinates (Angstroms) |           |           |
|------------------|------------------|----------------|-------------------------|-----------|-----------|
|                  |                  |                | X                       | Y         | Z         |
| 1                | 7                | 0              | 1.478652                | 0.328029  | 0.547583  |
| 2                | 8                | 0              | -1.649593               | -0.535628 | 0.333123  |
| 3                | 8                | 0              | -2.412697               | 0.446530  | 0.114679  |
| 4                | 8                | 0              | -0.652012               | -0.659622 | -0.520750 |
| 5                | 8                | 0              | 2.472553                | -0.342244 | -0.062311 |
| 6                | 1                | 0              | 3.009974                | -0.705297 | 0.652492  |
| 7                | 6                | 0              | 0.631684                | 0.802864  | -0.340084 |
| 8                | 1                | 0              | 0.866889                | 0.797301  | -1.400234 |
| 9                | 1                | 0              | -0.083547               | 1.522322  | 0.037238  |

## Standard orientation of Ts-F-a'

Cartesian coordinates of all the transition states optimized at the M05/6-311+G(d) level:

Standard orientation of transition state of Ts-F-a'

State = 1-A

Charge = 0 Multiplicity = 1

Lowest Harmonic Vibrational Frequency (LHVF) = -483.44 cm<sup>-1</sup>

Standard orientation:

| Center<br>Number | Atomic<br>Number | Atomic<br>Type | Coordinates (Angstroms) |           |           |
|------------------|------------------|----------------|-------------------------|-----------|-----------|
|                  |                  |                | X                       | Y         | Z         |
| 1                | 7                | 0              | 1.085921                | -0.031875 | 0.580010  |
| 2                | 8                | 0              | -1.581866               | -0.195216 | 0.127720  |
| 3                | 8                | 0              | -1.076815               | 0.750501  | -0.605920 |
| 4                | 8                | 0              | -0.830887               | -1.215101 | 0.154316  |
| 5                | 8                | 0              | 1.772708                | -0.431619 | -0.503182 |
| 6                | 1                | 0              | 2.218147                | -1.244353 | -0.234447 |
| 7                | 6                | 0              | 0.498066                | 1.137610  | 0.338425  |
| 8                | 1                | 0              | 0.043919                | 1.593173  | 1.207667  |
| 9                | 1                | 0              | 0.882975                | 1.780120  | -0.447321 |

## Standard orientation of Ts-F-a''

Cartesian coordinates of all the transition states optimized at the M05/6-311+G(d) level:

Standard orientation of transition state of Ts-F-a''

State = 1-A

Charge = 0    Multiplicity = 1

Lowest Harmonic Vibrational Frequency (LHVF) = -772.47 cm<sup>-1</sup>

Standard orientation:

| Center<br>Number | Atomic<br>Number | Atomic<br>Type | Coordinates (Angstroms) |           |           |
|------------------|------------------|----------------|-------------------------|-----------|-----------|
|                  |                  |                | X                       | Y         | Z         |
| 1                | 7                | 0              | 1.049418                | 0.005718  | 0.358865  |
| 2                | 8                | 0              | 0.952391                | 1.277877  | -0.093193 |
| 3                | 1                | 0              | 0.869701                | 1.824574  | 0.698704  |
| 4                | 6                | 0              | 1.629092                | -0.815134 | -0.514533 |
| 5                | 1                | 0              | 1.620435                | -1.865141 | -0.268879 |
| 6                | 8                | 0              | -1.342271               | -0.597740 | -0.199239 |
| 7                | 8                | 0              | -1.961438               | 0.465564  | -0.398857 |
| 8                | 8                | 0              | -0.356944               | -0.481735 | 0.887751  |
| 9                | 1                | 0              | 2.055486                | -0.420384 | -1.426375 |

## Standard orientation of Ts-F-a'''

Cartesian coordinates of all the transition states optimized at the M05/6-311+G(d) level:

Standard orientation of transition state of Ts-F-a'''

State = 1-A

Charge = 0 Multiplicity = 1

Lowest Harmonic Vibrational Frequency (LHVF) = -1232.75 cm<sup>-1</sup>

Standard orientation:

| Center<br>Number | Atomic<br>Number | Atomic<br>Type | Coordinates (Angstroms) |           |           |
|------------------|------------------|----------------|-------------------------|-----------|-----------|
|                  |                  |                | X                       | Y         | Z         |
| 1                | 1                | 0              | -0.937519               | 2.322529  | 0.537764  |
| 2                | 1                | 0              | 0.061804                | 1.182947  | -0.359540 |
| 3                | 8                | 0              | -0.187288               | -1.671196 | 0.276966  |
| 4                | 8                | 0              | -0.994528               | 1.754482  | -0.231275 |
| 5                | 1                | 0              | 0.190829                | -1.646805 | 1.161655  |
| 6                | 1                | 0              | -1.750996               | 0.686036  | 0.050334  |
| 7                | 8                | 0              | -2.186139               | -0.304714 | 0.267238  |
| 8                | 1                | 0              | -1.165158               | -1.074210 | 0.286204  |
| 9                | 1                | 0              | -2.793156               | -0.548814 | -0.432960 |
| 10               | 7                | 0              | 1.107215                | 0.429083  | -0.454698 |
| 11               | 6                | 0              | 0.917106                | -0.863384 | -0.739075 |
| 12               | 1                | 0              | 0.381784                | -1.017117 | -1.671668 |
| 13               | 8                | 0              | 1.910017                | 0.562278  | 0.712722  |
| 14               | 1                | 0              | 2.665230                | 1.082025  | 0.424126  |
| 15               | 1                | 0              | 1.757551                | -1.536667 | -0.583782 |

## Standard orientation of Ts-F-b

Cartesian coordinates of all the transition states optimized at the M05/6-311+G(d) level:

Standard orientation of transition state of Ts-F-b

State = 1-A

Charge = 0 Multiplicity = 1

Lowest Harmonic Vibrational Frequency (LHVF) = -348.11 cm<sup>-1</sup>

Standard orientation:

| Center<br>Number | Atomic<br>Number | Atomic<br>Type | Coordinates (Angstroms) |           |           |
|------------------|------------------|----------------|-------------------------|-----------|-----------|
|                  |                  |                | X                       | Y         | Z         |
| 1                | 7                | 0              | 1.164281                | 0.119357  | 0.122193  |
| 2                | 8                | 0              | 1.570955                | -0.700654 | -0.899685 |
| 3                | 1                | 0              | 1.750731                | -1.551300 | -0.470460 |
| 4                | 6                | 0              | 0.665738                | 1.286768  | -0.269553 |
| 5                | 1                | 0              | 0.577217                | 2.026713  | 0.506353  |
| 6                | 8                | 0              | 1.198852                | -0.309099 | 1.265000  |
| 7                | 8                | 0              | -1.673671               | -0.111260 | 0.412215  |
| 8                | 8                | 0              | -1.624764               | -1.175754 | -0.277222 |
| 9                | 8                | 0              | -1.375578               | 0.975799  | -0.245509 |
| 10               | 1                | 0              | 0.761292                | 1.536227  | -1.312311 |



## Standard orientation of Ts-F-b'

Cartesian coordinates of all the transition states optimized at the M05/6-311+G(d) level:

Standard orientation of transition state of Ts-F-b'

State = 1-A

Charge = 0 Multiplicity = 1

Lowest Harmonic Vibrational Frequency (LHVF) = -304.80 cm<sup>-1</sup>

Standard orientation:

| Center<br>Number | Atomic<br>Number | Atomic<br>Type | Coordinates (Angstroms) |           |           |
|------------------|------------------|----------------|-------------------------|-----------|-----------|
|                  |                  |                | X                       | Y         | Z         |
| 1                | 7                | 0              | 1.231555                | -0.087217 | -0.069161 |
| 2                | 6                | 0              | 0.727686                | 0.906261  | -0.861438 |
| 3                | 1                | 0              | 1.379928                | 1.765756  | -0.942528 |
| 4                | 1                | 0              | 0.218208                | 0.543611  | -1.746561 |
| 5                | 8                | 0              | 0.687922                | -1.239264 | -0.083355 |
| 6                | 1                | 0              | -0.933591               | -1.290355 | -0.077762 |
| 7                | 8                | 0              | 2.166726                | 0.120629  | 0.706408  |
| 8                | 8                | 0              | -1.912290               | -1.101136 | 0.044303  |
| 9                | 1                | 0              | -2.388174               | -1.379628 | -0.742827 |
| 10               | 1                | 0              | -1.962566               | 0.103577  | 0.212549  |
| 11               | 8                | 0              | -1.775626               | 1.279055  | 0.304352  |
| 12               | 1                | 0              | -1.816800               | 1.588056  | 1.214599  |
| 13               | 1                | 0              | -0.817858               | 1.367659  | -0.038388 |

## Standard orientation of Ts-F-c

Cartesian coordinates of all the transition states optimized at the M05/6-311+G(d) level:

Standard orientation of transition state of Ts-F-c

State = 1-A

Charge = 0 Multiplicity = 1

Lowest Harmonic Vibrational Frequency (LHVF) = -325.77 cm<sup>-1</sup>

Standard orientation:

| Center<br>Number | Atomic<br>Number | Atomic<br>Type | Coordinates (Angstroms) |           |           |
|------------------|------------------|----------------|-------------------------|-----------|-----------|
|                  |                  |                | X                       | Y         | Z         |
| 1                | 7                | 0              | -0.959521               | -0.009552 | 0.452541  |
| 2                | 8                | 0              | 1.581093                | 0.811024  | -0.374253 |
| 3                | 8                | 0              | 1.221994                | -0.475557 | -0.437526 |
| 4                | 8                | 0              | -0.739037               | 1.156543  | 0.442073  |
| 5                | 8                | 0              | -1.661947               | -0.499823 | -0.617194 |
| 6                | 1                | 0              | -1.836261               | 0.251363  | -1.213650 |
| 7                | 6                | 0              | 0.667270                | -0.941887 | 0.633109  |
| 8                | 1                | 0              | 0.929852                | -0.481606 | 1.578922  |
| 9                | 1                | 0              | 0.402612                | -1.989068 | 0.563475  |

## Standard orientation of Ts-F-c'

Cartesian coordinates of all the transition states optimized at the M05/6-311+G(d) level:

Standard orientation of transition state of Ts-F-c'

State = 1-A

Charge = 0 Multiplicity = 1

Lowest Harmonic Vibrational Frequency (LHVF) = -266.71 cm<sup>-1</sup>

Standard orientation:

| Center<br>Number | Atomic<br>Number | Atomic<br>Type | Coordinates (Angstroms) |           |           |
|------------------|------------------|----------------|-------------------------|-----------|-----------|
|                  |                  |                | X                       | Y         | Z         |
| 1                | 7                | 0              | 0.767721                | -0.020490 | 0.278672  |
| 2                | 8                | 0              | -1.701731               | -0.616521 | -0.204591 |
| 3                | 8                | 0              | -1.403188               | 0.558396  | -0.480710 |
| 4                | 8                | 0              | 0.389970                | -1.120703 | 0.634297  |
| 5                | 6                | 0              | 0.188376                | 1.118865  | 0.641032  |
| 6                | 1                | 0              | -0.327315               | 1.092814  | 1.585723  |
| 7                | 8                | 0              | 1.652650                | 0.072682  | -0.762497 |
| 8                | 1                | 0              | 1.775258                | -0.841588 | -1.061454 |
| 9                | 1                | 0              | 0.546149                | 2.028178  | 0.186843  |

## Standard orientation of Ts-F-d

Cartesian coordinates of all the transition states optimized at the M05/6-311+G(d) level:

Standard orientation of transition state of Ts-F-d

State = 1-A

Charge = 0 Multiplicity = 1

Lowest Harmonic Vibrational Frequency (LHVF) = -705.29 cm<sup>-1</sup>

Standard orientation:

| Center<br>Number | Atomic<br>Number | Atomic<br>Type | Coordinates (Angstroms) |           |           |
|------------------|------------------|----------------|-------------------------|-----------|-----------|
|                  |                  |                | X                       | Y         | Z         |
| 1                | 7                | 0              | -0.632912               | 0.304756  | -0.232273 |
| 2                | 8                | 0              | -2.654113               | -0.345094 | -0.615032 |
| 3                | 8                | 0              | -0.718033               | 1.405407  | 0.461534  |
| 4                | 1                | 0              | -0.163648               | 2.063726  | 0.013161  |
| 5                | 6                | 0              | -1.658721               | -0.622658 | 0.249088  |
| 6                | 1                | 0              | -1.241258               | -1.635511 | 0.171828  |
| 7                | 1                | 0              | -1.951364               | -0.417676 | 1.291405  |
| 8                | 8                | 0              | 2.035945                | -0.629859 | -0.237821 |
| 9                | 8                | 0              | 1.126265                | -0.782510 | 0.642074  |
| 10               | 8                | 0              | 2.427308                | 0.551071  | -0.418881 |

## Standard orientation of Ts-F-e

Cartesian coordinates of all the transition states optimized at the M05/6-311+G(d) level:

Standard orientation of transition state of Ts-F-e

State = 1-A

Charge = 0 Multiplicity = 1

Lowest Harmonic Vibrational Frequency (LHVF) = -460.56 cm<sup>-1</sup>

Standard orientation:

| Center<br>Number | Atomic<br>Number | Atomic<br>Type | Coordinates (Angstroms) |           |           |
|------------------|------------------|----------------|-------------------------|-----------|-----------|
|                  |                  |                | X                       | Y         | Z         |
| 1                | 7                | 0              | -1.223023               | 0.045296  | 0.102241  |
| 2                | 8                | 0              | -1.825543               | 0.088124  | -0.990564 |
| 3                | 8                | 0              | -1.015726               | 1.063328  | 0.794924  |
| 4                | 6                | 0              | -0.674346               | -1.144601 | 0.519359  |
| 5                | 8                | 0              | 1.796286                | 0.015778  | 0.252727  |
| 6                | 8                | 0              | 1.534471                | 1.127973  | -0.399135 |
| 7                | 8                | 0              | 1.249760                | -1.075493 | -0.326659 |
| 8                | 1                | 0              | -0.337219               | -1.179760 | 1.541953  |
| 9                | 1                | 0              | -0.969528               | -2.027373 | -0.024138 |

## Standard orientation of Ts-F-f

Cartesian coordinates of all the transition states optimized at the M05/6-311+G(d) level:

Standard orientation of transition state of Ts-F-f

State = 1-A

Charge = -1 Multiplicity = 1

Lowest Harmonic Vibrational Frequency (LHVF) = -288.49 cm<sup>-1</sup>

Standard orientation:

| Center<br>Number | Atomic<br>Number | Atomic<br>Type | Coordinates (Angstroms) |           |           |
|------------------|------------------|----------------|-------------------------|-----------|-----------|
|                  |                  |                | X                       | Y         | Z         |
| 1                | 7                | 0              | -1.010404               | -0.069963 | 0.000272  |
| 2                | 8                | 0              | -0.882692               | -1.229356 | -0.212679 |
| 3                | 8                | 0              | -1.949023               | 0.561607  | 0.371157  |
| 4                | 8                | 0              | 2.006582                | -0.224177 | 0.667256  |
| 5                | 8                | 0              | 1.380165                | 0.079694  | -0.505373 |
| 6                | 8                | 0              | 0.329071                | 0.873450  | -0.320599 |

## Standard orientation of Ts-H-a

Cartesian coordinates of all the transition states optimized at the M05/6-311+G(d) level:

Standard orientation of transition state of Ts-H-a

State = 1-A

Charge = 0 Multiplicity = 1

Lowest Harmonic Vibrational Frequency (LHVF) = -561.11 cm<sup>-1</sup>

Standard orientation:

| Center<br>Number | Atomic<br>Number | Atomic<br>Type | Coordinates (Angstroms) |           |           |
|------------------|------------------|----------------|-------------------------|-----------|-----------|
|                  |                  |                | X                       | Y         | Z         |
| 1                | 7                | 0              | -0.284596               | 0.647956  | 0.166134  |
| 2                | 8                | 0              | -0.953519               | 1.749269  | -0.253405 |
| 3                | 1                | 0              | -1.837506               | 1.644085  | 0.125228  |
| 4                | 6                | 0              | 1.046902                | 0.821778  | 0.200298  |
| 5                | 8                | 0              | -1.636463               | -1.285377 | -0.076332 |
| 6                | 8                | 0              | -2.499898               | -0.551193 | 0.467383  |
| 7                | 8                | 0              | -0.636003               | -0.515242 | -0.758913 |
| 8                | 1                | 0              | 1.434330                | 1.797005  | -0.069613 |
| 9                | 6                | 0              | 1.939707                | -0.283629 | 0.612951  |
| 10               | 1                | 0              | 2.462459                | 0.025103  | 1.529774  |
| 11               | 1                | 0              | 1.348331                | -1.174516 | 0.852114  |
| 12               | 8                | 0              | 2.860788                | -0.524292 | -0.429670 |
| 13               | 1                | 0              | 3.585677                | -1.041580 | -0.072427 |

## Standard orientation of Ts-H-a'

Cartesian coordinates of all the transition states optimized at the M05/6-311+G(d) level:

Standard orientation of transition state of Ts-H-a'

State = 1-A

Charge = 0 Multiplicity = 1

Lowest Harmonic Vibrational Frequency (LHVF) = -447.63 cm<sup>-1</sup>

Standard orientation:

| Center<br>Number | Atomic<br>Number | Atomic<br>Type | Coordinates (Angstroms) |           |           |
|------------------|------------------|----------------|-------------------------|-----------|-----------|
|                  |                  |                | X                       | Y         | Z         |
| 1                | 7                | 0              | -0.093277               | 1.070326  | -0.373516 |
| 2                | 8                | 0              | -1.345555               | -1.323537 | -0.198920 |
| 3                | 8                | 0              | -0.856460               | -0.991758 | 0.961624  |
| 4                | 8                | 0              | -1.860611               | -0.325784 | -0.785891 |
| 5                | 8                | 0              | -0.793223               | 1.991100  | 0.303263  |
| 6                | 1                | 0              | -1.142948               | 2.589338  | -0.368495 |
| 7                | 6                | 0              | 0.492729                | 0.224247  | 0.479982  |
| 8                | 1                | 0              | 0.625960                | 0.557332  | 1.506515  |
| 9                | 6                | 0              | 1.524257                | -0.688483 | -0.111857 |
| 10               | 1                | 0              | 1.657271                | -1.548009 | 0.551758  |
| 11               | 1                | 0              | 1.166619                | -1.050517 | -1.084107 |
| 12               | 8                | 0              | 2.710325                | 0.059880  | -0.239614 |
| 13               | 1                | 0              | 3.408308                | -0.534224 | -0.523509 |



## Standard orientation of Ts-H-a''

Cartesian coordinates of all the transition states optimized at the M05/6-311+G(d) level:

Standard orientation of transition state of Ts-H-a''

State = 1-A

Charge = 0 Multiplicity = 1

Lowest Harmonic Vibrational Frequency (LHVF) = -514.71 cm<sup>-1</sup>

Standard orientation:

| Center<br>Number | Atomic<br>Number | Atomic<br>Type | Coordinates (Angstroms) |           |           |
|------------------|------------------|----------------|-------------------------|-----------|-----------|
|                  |                  |                | X                       | Y         | Z         |
| 1                | 7                | 0              | -1.227086               | -1.156269 | -0.329348 |
| 2                | 8                | 0              | 2.028427                | 0.512902  | -0.318348 |
| 3                | 8                | 0              | 2.512477                | 0.237555  | 0.815910  |
| 4                | 8                | 0              | 1.176599                | -0.389765 | -0.784368 |
| 5                | 8                | 0              | -0.938625               | -2.241620 | 0.400622  |
| 6                | 1                | 0              | -1.440023               | -2.962637 | -0.001169 |
| 7                | 6                | 0              | -0.554982               | -0.106234 | 0.114759  |
| 8                | 1                | 0              | -0.100398               | -0.158537 | 1.104216  |
| 9                | 6                | 0              | -0.965510               | 1.233217  | -0.425432 |
| 10               | 1                | 0              | -0.094974               | 1.893681  | -0.481667 |
| 11               | 1                | 0              | -1.365033               | 1.105370  | -1.431654 |
| 12               | 8                | 0              | -1.989438               | 1.793795  | 0.362973  |
| 13               | 1                | 0              | -1.602527               | 2.151162  | 1.165433  |

## Standard orientation of Ts-H-a'''

Cartesian coordinates of all the transition states optimized at the M05/6-311+G(d) level:

Standard orientation of transition state of Ts-H-a'''

State = 1-A

Charge = 0 Multiplicity = 1

Lowest Harmonic Vibrational Frequency (LHVF) = -139.31 cm<sup>-1</sup>

Standard orientation:

| Center<br>Number | Atomic<br>Number | Atomic<br>Type | Coordinates (Angstroms) |           |           |
|------------------|------------------|----------------|-------------------------|-----------|-----------|
|                  |                  |                | X                       | Y         | Z         |
| 1                | 1                | 0              | -2.188041               | 1.072960  | -1.952408 |
| 2                | 1                | 0              | -0.286857               | 0.987108  | -0.873241 |
| 3                | 8                | 0              | -0.527596               | -0.594053 | 1.969746  |
| 4                | 8                | 0              | -1.524910               | 0.412916  | -1.750752 |
| 5                | 1                | 0              | -0.820322               | 0.190823  | 2.436166  |
| 6                | 1                | 0              | -1.907821               | -0.220237 | -1.000468 |
| 7                | 8                | 0              | -2.236054               | -1.048060 | 0.144875  |
| 8                | 1                | 0              | -1.262380               | -0.812162 | 1.272494  |
| 9                | 1                | 0              | -2.247382               | -1.972387 | -0.102527 |
| 10               | 7                | 0              | 0.448335                | 1.158268  | -0.130176 |
| 11               | 6                | 0              | 1.005345                | 0.191348  | 0.508192  |
| 12               | 8                | 0              | 0.420098                | 2.389710  | 0.458078  |
| 13               | 1                | 0              | 0.677040                | 3.019697  | -0.227638 |
| 14               | 1                | 0              | 1.632889                | 0.455800  | 1.348931  |
| 15               | 6                | 0              | 1.093702                | -1.171489 | -0.123128 |
| 16               | 1                | 0              | 1.200860                | -1.909733 | 0.672519  |
| 17               | 1                | 0              | 0.171701                | -1.381189 | -0.662054 |
| 18               | 8                | 0              | 2.157897                | -1.202598 | -1.040459 |
| 19               | 1                | 0              | 2.982201                | -1.321031 | -0.562841 |

## Standard orientation of Ts-H-b

Cartesian coordinates of all the transition states optimized at the M05/6-311+G(d) level:

Standard orientation of transition state of Ts-H-b

State = 1-A

Charge = 0 Multiplicity = 1

Lowest Harmonic Vibrational Frequency (LHVF) = -313.63 cm<sup>-1</sup>

Standard orientation:

| Center<br>Number | Atomic<br>Number | Atomic<br>Type | Coordinates (Angstroms) |           |           |
|------------------|------------------|----------------|-------------------------|-----------|-----------|
|                  |                  |                | X                       | Y         | Z         |
| 1                | 7                | 0              | 0.309736                | -1.173267 | 0.002484  |
| 2                | 8                | 0              | -0.529305               | -2.122398 | -0.513656 |
| 3                | 1                | 0              | -0.860930               | -2.598883 | 0.263328  |
| 4                | 6                | 0              | 0.730278                | -0.257872 | -0.868128 |
| 5                | 8                | 0              | 0.552745                | -1.206314 | 1.207527  |
| 6                | 8                | 0              | -1.420482               | 1.276308  | 0.235143  |
| 7                | 8                | 0              | -2.359408               | 0.466515  | 0.497582  |
| 8                | 8                | 0              | -0.860247               | 1.101404  | -0.928612 |
| 9                | 1                | 0              | 0.536762                | -0.495488 | -1.902559 |
| 10               | 6                | 0              | 1.851495                | 0.651205  | -0.464891 |
| 11               | 1                | 0              | 1.963532                | 1.398420  | -1.249472 |
| 12               | 1                | 0              | 2.775343                | 0.051748  | -0.450032 |
| 13               | 8                | 0              | 1.658194                | 1.335826  | 0.736586  |
| 14               | 1                | 0              | 1.594535                | 0.686347  | 1.442897  |

## Standard orientation of Ts-H-b'

Cartesian coordinates of all the transition states optimized at the M05/6-311+G(d) level:

Standard orientation of transition state of Ts-H-b'

State = 1-A

Charge = 0 Multiplicity = 1

Lowest Harmonic Vibrational Frequency (LHVF) = -357.41 cm<sup>-1</sup>

Standard orientation:

| Center<br>Number | Atomic<br>Number | Atomic<br>Type | Coordinates (Angstroms) |           |           |
|------------------|------------------|----------------|-------------------------|-----------|-----------|
|                  |                  |                | X                       | Y         | Z         |
| 1                | 7                | 0              | 0.250084                | -0.928785 | 0.160652  |
| 2                | 6                | 0              | 0.527547                | 0.343436  | -0.287363 |
| 3                | 1                | 0              | 0.142655                | 0.503474  | -1.290053 |
| 4                | 8                | 0              | -0.730284               | -1.560621 | -0.343029 |
| 5                | 1                | 0              | -2.151677               | -0.757386 | -0.574950 |
| 6                | 8                | 0              | 0.889876                | -1.450410 | 1.074270  |
| 7                | 8                | 0              | -2.917498               | -0.118836 | -0.511686 |
| 8                | 1                | 0              | -3.224640               | 0.093944  | -1.397020 |
| 9                | 1                | 0              | -2.429452               | 0.861775  | 0.070155  |
| 10               | 8                | 0              | -1.751357               | 1.669665  | 0.583919  |
| 11               | 1                | 0              | -1.911936               | 1.731913  | 1.530885  |
| 12               | 1                | 0              | -0.808990               | 1.298479  | 0.420345  |
| 13               | 6                | 0              | 1.829835                | 0.950358  | 0.074580  |
| 14               | 1                | 0              | 1.772898                | 2.031936  | -0.106368 |
| 15               | 1                | 0              | 2.024573                | 0.798464  | 1.141627  |
| 16               | 8                | 0              | 2.882586                | 0.383406  | -0.705753 |
| 17               | 1                | 0              | 3.705096                | 0.790496  | -0.424258 |

## Standard orientation of Ts-H-c

Cartesian coordinates of all the transition states optimized at the M05/6-311+G(d) level:

Standard orientation of transition state of Ts-H-c

State = 1-A

Charge = 0 Multiplicity = 1

Lowest Harmonic Vibrational Frequency (LHVF) = -278.43 cm<sup>-1</sup>

Standard orientation:

| Center<br>Number | Atomic<br>Number | Atomic<br>Type | Coordinates (Angstroms) |           |           |
|------------------|------------------|----------------|-------------------------|-----------|-----------|
|                  |                  |                | X                       | Y         | Z         |
| 1                | 7                | 0              | 0.961839                | -0.725672 | -0.049540 |
| 2                | 8                | 0              | -0.296962               | 1.651295  | -0.814199 |
| 3                | 8                | 0              | 0.055788                | 1.394653  | 0.447088  |
| 4                | 8                | 0              | 0.910811                | -0.489523 | -1.210285 |
| 5                | 8                | 0              | 2.193156                | -0.550699 | 0.553536  |
| 6                | 1                | 0              | 2.802661                | -0.243969 | -0.141448 |
| 7                | 6                | 0              | -0.280416               | 0.223631  | 0.926078  |
| 8                | 1                | 0              | 0.102344                | 0.140290  | 1.938808  |
| 9                | 6                | 0              | -1.597413               | -0.456828 | 0.698708  |
| 10               | 1                | 0              | -1.620106               | -1.297085 | 1.401616  |
| 11               | 1                | 0              | -2.342996               | 0.278747  | 1.044374  |
| 12               | 8                | 0              | -1.837955               | -0.874588 | -0.608256 |
| 13               | 1                | 0              | -2.606503               | -1.448197 | -0.588357 |

## Standard orientation of Ts-H-c'

Cartesian coordinates of all the transition states optimized at the M05/6-311+G(d) level:

Standard orientation of transition state of Ts-H-c'

State = 1-A

Charge = 0 Multiplicity = 1

Lowest Harmonic Vibrational Frequency (LHVF) = -276.31 cm<sup>-1</sup>

Standard orientation:

| Center<br>Number | Atomic<br>Number | Atomic<br>Type | Coordinates (Angstroms) |           |           |
|------------------|------------------|----------------|-------------------------|-----------|-----------|
|                  |                  |                | X                       | Y         | Z         |
| 1                | 7                | 0              | -0.775430               | -0.622995 | 0.216690  |
| 2                | 8                | 0              | -0.323477               | 1.895297  | 0.193020  |
| 3                | 8                | 0              | -0.184934               | 1.346354  | -0.921527 |
| 4                | 8                | 0              | -0.691987               | -0.070490 | 1.293774  |
| 5                | 6                | 0              | 0.166554                | -0.624914 | -0.734811 |
| 6                | 8                | 0              | -2.026647               | -0.990495 | -0.233816 |
| 7                | 1                | 0              | -2.639032               | -0.561785 | 0.383798  |
| 8                | 1                | 0              | -0.190229               | -0.994480 | -1.685938 |
| 9                | 6                | 0              | 1.626364                | -0.739862 | -0.482654 |
| 10               | 1                | 0              | 2.111433                | -0.326328 | -1.376906 |
| 11               | 1                | 0              | 1.851009                | -1.819402 | -0.473155 |
| 12               | 8                | 0              | 2.045983                | -0.114260 | 0.688085  |
| 13               | 1                | 0              | 2.985812                | -0.279637 | 0.783871  |

## Standard orientation of Ts-H-d

Cartesian coordinates of all the transition states optimized at the M05/6-311+G(d) level:

Standard orientation of transition state of Ts-H-d

State = 1-A

Charge = 0 Multiplicity = 1

Lowest Harmonic Vibrational Frequency (LHVF) = -1066.05 cm<sup>-1</sup>

Standard orientation:

| Center<br>Number | Atomic<br>Number | Atomic<br>Type | Coordinates (Angstroms) |           |           |
|------------------|------------------|----------------|-------------------------|-----------|-----------|
|                  |                  |                | X                       | Y         | Z         |
| 1                | 7                | 0              | -0.232783               | -0.811666 | -0.207759 |
| 2                | 8                | 0              | 1.691782                | -1.230030 | -1.055134 |
| 3                | 8                | 0              | -0.202374               | -1.277215 | 1.008336  |
| 4                | 1                | 0              | -0.980281               | -1.848376 | 1.109651  |
| 5                | 6                | 0              | 1.059356                | -0.172948 | -0.527599 |
| 6                | 1                | 0              | 0.822576                | 0.619847  | -1.253910 |
| 7                | 8                | 0              | -2.577259               | 0.737765  | -0.489543 |
| 8                | 8                | 0              | -1.433187               | 1.102365  | -0.063221 |
| 9                | 8                | 0              | -3.174258               | -0.119715 | 0.209072  |
| 10               | 6                | 0              | 1.819470                | 0.478778  | 0.649532  |
| 11               | 1                | 0              | 1.129354                | 1.165429  | 1.143778  |
| 12               | 1                | 0              | 2.118214                | -0.298606 | 1.357220  |
| 13               | 8                | 0              | 2.902342                | 1.233198  | 0.193934  |
| 14               | 1                | 0              | 3.610291                | 0.637434  | -0.061582 |

## Standard orientation of Ts-H-e

Cartesian coordinates of all the transition states optimized at the M05/6-311+G(d) level:

Standard orientation of transition state of Ts-H-e

State = 1-A

Charge = 0 Multiplicity = 1

Lowest Harmonic Vibrational Frequency (LHVF) = -166.47 cm<sup>-1</sup>

Standard orientation:

| Center<br>Number | Atomic<br>Number | Atomic<br>Type | Coordinates (Angstroms) |           |           |
|------------------|------------------|----------------|-------------------------|-----------|-----------|
|                  |                  |                | X                       | Y         | Z         |
| 1                | 7                | 0              | -1.306147               | -0.677783 | -0.059391 |
| 2                | 8                | 0              | 0.769574                | 1.773310  | 0.267814  |
| 3                | 8                | 0              | 0.814299                | 0.989674  | -0.816628 |
| 4                | 8                | 0              | -0.337709               | 2.430502  | 0.387143  |
| 5                | 8                | 0              | -2.181210               | -0.472698 | -0.913171 |
| 6                | 6                | 0              | 0.007872                | -0.845996 | -0.478984 |
| 7                | 1                | 0              | 0.101083                | -1.078254 | -1.529380 |
| 8                | 8                | 0              | -1.553554               | -0.728900 | 1.157556  |
| 9                | 6                | 0              | 1.033055                | -1.318268 | 0.489606  |
| 10               | 1                | 0              | 0.934751                | -0.741701 | 1.418254  |
| 11               | 1                | 0              | 0.869778                | -2.371045 | 0.746899  |
| 12               | 8                | 0              | 2.318344                | -1.212486 | -0.065619 |
| 13               | 1                | 0              | 2.353892                | -0.314155 | -0.420519 |



## Standard orientation of Ts-M-e'

Cartesian coordinates of all the transition states optimized at the LC- $\omega$ PBE/6-311++G(d,p) level:

Standard orientation of transition state of Ts-B-e'

State = 1-A

Charge = 0    Multiplicity = 1

Lowest Harmonic Vibrational Frequency (LHVF) = -1134.96 cm<sup>-1</sup>

Standard orientation:

| Center<br>Number | Atomic<br>Number | Atomic<br>Type | Coordinates (Angstroms) |           |           |
|------------------|------------------|----------------|-------------------------|-----------|-----------|
|                  |                  |                | X                       | Y         | Z         |
| 1                | 7                | 0              | -1.503413               | -0.168415 | -0.367801 |
| 2                | 6                | 0              | -1.285805               | 0.713177  | 0.607489  |
| 3                | 1                | 0              | -0.834372               | 0.360743  | 1.538458  |
| 4                | 8                | 0              | -0.866614               | -1.253089 | -0.322806 |
| 5                | 1                | 0              | 0.799940                | -1.264416 | 0.171065  |
| 6                | 8                | 0              | 1.736589                | -0.947372 | 0.180927  |
| 7                | 1                | 0              | 2.114560                | -1.175071 | 1.035791  |
| 8                | 1                | 0              | 1.511490                | 0.527691  | -0.111516 |
| 9                | 8                | 0              | 1.068092                | 1.443883  | -0.256058 |
| 10               | 1                | 0              | 1.151845                | 1.709470  | -1.181776 |
| 11               | 1                | 0              | -0.033048               | 1.244517  | 0.023309  |
| 12               | 1                | 0              | -1.976222               | 1.549539  | 0.637840  |

## Standard orientation of Ts-M-f''

Cartesian coordinates of all the transition states optimized at the LC- $\omega$ PBE/6-311++G(d,p) level:

Standard orientation of transition state of Ts-M-f''

State = 1-A

Charge = 0    Multiplicity = 1

Lowest Harmonic Vibrational Frequency (LHVF) = -159.82 cm<sup>-1</sup>

Standard orientation:

| Center<br>Number | Atomic<br>Number | Atomic<br>Type | Coordinates (Angstroms) |           |           |
|------------------|------------------|----------------|-------------------------|-----------|-----------|
|                  |                  |                | X                       | Y         | Z         |
| 1                | 8                | 0              | -0.074869               | -1.509253 | -0.391407 |
| 2                | 1                | 0              | -1.032278               | -1.305401 | -0.037053 |
| 3                | 1                | 0              | -0.138914               | -1.463726 | -1.349335 |
| 4                | 8                | 0              | -2.339603               | -0.865405 | 0.487872  |
| 5                | 1                | 0              | -3.087120               | -1.313185 | 0.087488  |
| 6                | 1                | 0              | -2.113096               | 0.509483  | -0.007207 |
| 7                | 8                | 0              | -1.807694               | 1.439027  | -0.356991 |
| 8                | 1                | 0              | -2.209320               | 2.097140  | 0.214896  |
| 9                | 1                | 0              | 0.037468                | 1.318987  | -0.156822 |
| 10               | 8                | 0              | 2.424670                | -0.439455 | -0.090456 |
| 11               | 1                | 0              | 2.599364                | -1.311451 | 0.323168  |
| 12               | 7                | 0              | 1.495401                | 0.103047  | 0.533668  |
| 13               | 6                | 0              | 1.149335                | 1.345301  | 0.004200  |
| 14               | 1                | 0              | 1.720816                | 1.633818  | -0.875640 |
| 15               | 1                | 0              | 1.239231                | 2.041887  | 0.847486  |

## Standard orientation of Ts-M-h

Cartesian coordinates of all the transition states optimized at the LC- $\omega$ PBE/6-311++G(d,p) level:

Standard orientation of transition state of Ts-M-h

State = 1-A

Charge = -1    Multiplicity = 1

Lowest Harmonic Vibrational Frequency (LHVF) = -559.44 cm<sup>-1</sup>

Standard orientation:

| Center<br>Number | Atomic<br>Number | Atomic<br>Type | Coordinates (Angstroms) |           |           |
|------------------|------------------|----------------|-------------------------|-----------|-----------|
|                  |                  |                | X                       | Y         | Z         |
| 1                | 7                | 0              | 1.146387                | -0.033486 | 0.141143  |
| 2                | 8                | 0              | 1.870743                | -0.155523 | -0.878359 |
| 3                | 8                | 0              | 0.715381                | -1.048524 | 0.763807  |
| 4                | 6                | 0              | 0.670257                | 1.177682  | 0.521433  |
| 5                | 8                | 0              | -1.736639               | 0.013317  | 0.190609  |
| 6                | 8                | 0              | -1.307658               | -1.138779 | -0.364332 |
| 7                | 8                | 0              | -1.210461               | 1.066505  | -0.414881 |
| 8                | 1                | 0              | 0.241326                | 1.235103  | 1.509037  |
| 9                | 1                | 0              | 1.061492                | 2.037230  | -0.000384 |

## Standard orientation of Ts-E-e'

Cartesian coordinates of all the transition states optimized at the LC- $\omega$ PBE/6-311++G(d,p) level:

Standard orientation of transition state of Ts-E-e'

State = 1-A

Charge = 0 Multiplicity = 1

Lowest Harmonic Vibrational Frequency (LHVF) = -1235.47 cm<sup>-1</sup>

Standard orientation:

| Center<br>Number | Atomic<br>Number | Atomic<br>Type | Coordinates (Angstroms) |           |           |
|------------------|------------------|----------------|-------------------------|-----------|-----------|
|                  |                  |                | X                       | Y         | Z         |
| 1                | 7                | 0              | -0.681467               | -0.998574 | -0.515721 |
| 2                | 6                | 0              | -1.074240               | -0.091322 | 0.376586  |
| 3                | 1                | 0              | -0.580161               | -0.121551 | 1.354203  |
| 4                | 8                | 0              | 0.416084                | -1.589553 | -0.311371 |
| 5                | 1                | 0              | 1.780475                | -0.757472 | 0.337085  |
| 6                | 8                | 0              | 2.439635                | -0.021578 | 0.401468  |
| 7                | 1                | 0              | 2.739149                | 0.025286  | 1.314282  |
| 8                | 1                | 0              | 1.536482                | 1.111617  | -0.107525 |
| 9                | 8                | 0              | 0.713742                | 1.641044  | -0.409538 |
| 10               | 1                | 0              | 0.780531                | 1.837953  | -1.353411 |
| 11               | 1                | 0              | -0.172679               | 0.901667  | -0.187815 |
| 12               | 6                | 0              | -2.480875               | 0.432594  | 0.291154  |
| 13               | 1                | 0              | -2.537959               | 1.468258  | 0.631491  |
| 14               | 1                | 0              | -2.836807               | 0.392824  | -0.739486 |
| 15               | 1                | 0              | -3.163758               | -0.155492 | 0.910314  |

## Standard orientation of Ts-E-f'

Cartesian coordinates of all the transition states optimized at the LC- $\omega$ PBE/6-311++G(d,p) level:

Standard orientation of transition state of Ts-E-f'

State = 1-A

Charge = 0    Multiplicity = 1

Lowest Harmonic Vibrational Frequency (LHVF) = -154.93 cm<sup>-1</sup>

Standard orientation:

| Center<br>Number | Atomic<br>Number | Atomic<br>Type | Coordinates (Angstroms) |           |           |
|------------------|------------------|----------------|-------------------------|-----------|-----------|
|                  |                  |                | X                       | Y         | Z         |
| 1                | 7                | 0              | 1.381318                | -0.420359 | -0.730034 |
| 2                | 1                | 0              | -2.333691               | 1.336908  | -1.503248 |
| 3                | 6                | 0              | 1.047177                | 0.904017  | -0.418799 |
| 4                | 1                | 0              | 1.455829                | 1.449540  | -1.284889 |
| 5                | 1                | 0              | -0.048783               | 0.970779  | -0.638419 |
| 6                | 8                | 0              | -0.530404               | -1.768033 | -0.154418 |
| 7                | 8                | 0              | -1.907356               | 1.460969  | -0.652251 |
| 8                | 1                | 0              | -0.824907               | -2.105977 | -1.003799 |
| 9                | 1                | 0              | -2.214745               | 0.677502  | -0.054438 |
| 10               | 8                | 0              | 2.030074                | -0.977271 | 0.176535  |
| 11               | 1                | 0              | 2.212811                | -1.897794 | -0.103220 |
| 12               | 8                | 0              | -2.428840               | -0.497145 | 0.851296  |
| 13               | 1                | 0              | -1.361717               | -1.284483 | 0.268566  |
| 14               | 1                | 0              | -3.292723               | -0.911193 | 0.812252  |
| 15               | 6                | 0              | 1.431492                | 1.453866  | 0.927190  |
| 16               | 1                | 0              | 1.095197                | 2.488022  | 0.985648  |
| 17               | 1                | 0              | 0.952810                | 0.891964  | 1.730368  |
| 18               | 1                | 0              | 2.510875                | 1.431786  | 1.081778  |

## Standard orientation of Ts-E-h

Cartesian coordinates of all the transition states optimized at the LC- $\omega$ PBE/6-311++G(d,p) level:

Standard orientation of transition state of Ts-E-h

State = 1-A

Charge = -1    Multiplicity = 1

Lowest Harmonic Vibrational Frequency (LHVF) = -535.19 cm<sup>-1</sup>

Standard orientation:

| Center<br>Number | Atomic<br>Number | Atomic<br>Type | Coordinates (Angstroms) |           |           |
|------------------|------------------|----------------|-------------------------|-----------|-----------|
|                  |                  |                | X                       | Y         | Z         |
| 1                | 7                | 0              | -0.614742               | 0.846782  | 0.162224  |
| 2                | 8                | 0              | -1.176588               | 1.342624  | -0.848727 |
| 3                | 8                | 0              | 0.344499                | 1.446965  | 0.739152  |
| 4                | 6                | 0              | -0.909886               | -0.410037 | 0.584960  |
| 5                | 8                | 0              | 1.769038                | -0.793593 | 0.184481  |
| 6                | 8                | 0              | 2.038150                | 0.385424  | -0.410953 |
| 7                | 8                | 0              | 0.720930                | -1.384419 | -0.366806 |
| 8                | 1                | 0              | -0.508319               | -0.647077 | 1.559239  |
| 9                | 6                | 0              | -2.045467               | -1.138727 | -0.013619 |
| 10               | 1                | 0              | -1.950335               | -1.171725 | -1.099686 |
| 11               | 1                | 0              | -2.083553               | -2.153286 | 0.380464  |
| 12               | 1                | 0              | -2.990727               | -0.638805 | 0.219200  |

## Standard orientation of Ts-B-a

Cartesian coordinates of all the transition states optimized at the LC- $\omega$ PBE/6-311++G(d,p) level:

Standard orientation of transition state of Ts-B-a

State = 1-A

Charge = 0 Multiplicity = 1

Lowest Harmonic Vibrational Frequency (LHVF) = -172.77 cm<sup>-1</sup>

Standard orientation:

| Center<br>Number | Atomic<br>Number | Atomic<br>Type | Coordinates (Angstroms) |           |           |
|------------------|------------------|----------------|-------------------------|-----------|-----------|
|                  |                  |                | X                       | Y         | Z         |
| 1                | 7                | 0              | -1.193517               | -0.615344 | 0.103969  |
| 2                | 6                | 0              | -0.102401               | -0.524177 | 1.105523  |
| 3                | 1                | 0              | -0.129404               | -1.490864 | 1.614462  |
| 4                | 6                | 0              | 1.244611                | -0.195044 | 0.543849  |
| 5                | 6                | 0              | 2.127645                | -1.208655 | 0.193661  |
| 6                | 6                | 0              | 1.618452                | 1.130089  | 0.354143  |
| 7                | 6                | 0              | 3.368566                | -0.902253 | -0.341732 |
| 8                | 1                | 0              | 1.844642                | -2.245866 | 0.344166  |
| 9                | 6                | 0              | 2.857826                | 1.437734  | -0.182435 |
| 10               | 1                | 0              | 0.935710                | 1.927534  | 0.631090  |
| 11               | 6                | 0              | 3.734476                | 0.421330  | -0.531207 |
| 12               | 1                | 0              | 4.053061                | -1.700096 | -0.608461 |
| 13               | 1                | 0              | 3.142123                | 2.474637  | -0.324757 |
| 14               | 1                | 0              | 4.706541                | 0.661801  | -0.948119 |
| 15               | 8                | 0              | -0.939489               | -0.480670 | -1.040447 |
| 16               | 8                | 0              | -3.575699               | 0.611282  | -0.418505 |
| 17               | 8                | 0              | -2.900375               | 0.620951  | 0.686174  |
| 18               | 8                | 0              | -4.438214               | -0.313209 | -0.490561 |
| 19               | 1                | 0              | -0.462900               | 0.219276  | 1.819746  |

## Standard orientation of Ts-B-b

Cartesian coordinates of all the transition states optimized at the LC- $\omega$ PBE/6-311++G(d,p) level:

Standard orientation of transition state of Ts-B-b

State = 1-A

Charge = 0 Multiplicity = 1

Lowest Harmonic Vibrational Frequency (LHVF) = -896.61 cm<sup>-1</sup>

Standard orientation:

| Center<br>Number | Atomic<br>Number | Atomic<br>Type | Coordinates (Angstroms) |           |           |
|------------------|------------------|----------------|-------------------------|-----------|-----------|
|                  |                  |                | X                       | Y         | Z         |
| 1                | 7                | 0              | -1.278637               | -0.786333 | -0.305315 |
| 2                | 1                | 0              | -1.462980               | 0.288874  | -0.531800 |
| 3                | 1                | 0              | -0.890397               | -1.231375 | -1.137640 |
| 4                | 6                | 0              | -0.331553               | -0.936350 | 0.823492  |
| 5                | 1                | 0              | -0.760811               | -0.392521 | 1.664097  |
| 6                | 1                | 0              | -0.294676               | -1.997293 | 1.070051  |
| 7                | 8                | 0              | -2.490351               | -1.403747 | -0.028379 |
| 8                | 8                | 0              | -2.052793               | 1.609901  | -0.788430 |
| 9                | 1                | 0              | -3.093596               | 1.234159  | -0.351891 |
| 10               | 1                | 0              | -1.707164               | 2.341914  | -0.272851 |
| 11               | 8                | 0              | -4.026520               | 0.544616  | 0.029512  |
| 12               | 1                | 0              | -3.201818               | -0.625810 | 0.050559  |
| 13               | 1                | 0              | -4.319689               | 0.822234  | 0.900102  |
| 14               | 6                | 0              | 1.021045                | -0.403020 | 0.442653  |
| 15               | 6                | 0              | 1.372448                | 0.909067  | 0.736733  |
| 16               | 6                | 0              | 1.928330                | -1.216466 | -0.226975 |
| 17               | 6                | 0              | 2.611768                | 1.402771  | 0.362628  |
| 18               | 1                | 0              | 0.674720                | 1.547275  | 1.269786  |
| 19               | 6                | 0              | 3.166660                | -0.723040 | -0.604210 |
| 20               | 1                | 0              | 1.669186                | -2.247955 | -0.446941 |
| 21               | 6                | 0              | 3.509190                | 0.587824  | -0.310039 |
| 22               | 1                | 0              | 2.878764                | 2.426599  | 0.600671  |
| 23               | 1                | 0              | 3.868695                | -1.366327 | -1.123220 |
| 24               | 1                | 0              | 4.480225                | 0.973679  | -0.601043 |



## Standard orientation of Ts-B-c

Cartesian coordinates of all the transition states optimized at the LC- $\omega$ PBE/6-311++G(d,p) level:

Standard orientation of transition state of Ts-B-c

State = 1-A

Charge = 0 Multiplicity = 1

Lowest Harmonic Vibrational Frequency (LHVF) = -261.62 cm<sup>-1</sup>

Standard orientation:

| Center<br>Number | Atomic<br>Number | Atomic<br>Type | Coordinates (Angstroms) |           |           |
|------------------|------------------|----------------|-------------------------|-----------|-----------|
|                  |                  |                | X                       | Y         | Z         |
| 1                | 7                | 0              | 1.244899                | -1.008790 | -0.274982 |
| 2                | 6                | 0              | 0.363079                | -0.872125 | 0.889603  |
| 3                | 8                | 0              | 2.820912                | 0.885783  | -0.540392 |
| 4                | 8                | 0              | 1.663320                | 0.586769  | -0.980966 |
| 5                | 8                | 0              | 2.786463                | 1.502227  | 0.664345  |
| 6                | 1                | 0              | 0.867906                | -0.197821 | 1.577361  |
| 7                | 1                | 0              | 0.804742                | -1.474987 | -1.070006 |
| 8                | 1                | 0              | 0.273741                | -1.863124 | 1.341455  |
| 9                | 8                | 0              | 2.417924                | -1.572226 | 0.070650  |
| 10               | 1                | 0              | 2.952532                | -1.653207 | -0.734309 |
| 11               | 6                | 0              | -0.978181               | -0.347664 | 0.460559  |
| 12               | 6                | 0              | -1.235634               | 1.017706  | 0.464951  |
| 13               | 6                | 0              | -1.972720               | -1.230120 | 0.056209  |
| 14               | 6                | 0              | -2.473160               | 1.494933  | 0.066614  |
| 15               | 1                | 0              | -0.460097               | 1.706593  | 0.781032  |
| 16               | 6                | 0              | -3.209604               | -0.752527 | -0.347401 |
| 17               | 1                | 0              | -1.783123               | -2.299455 | 0.064045  |
| 18               | 6                | 0              | -3.460369               | 0.610477  | -0.341948 |
| 19               | 1                | 0              | -2.668607               | 2.561640  | 0.076786  |
| 20               | 1                | 0              | -3.981080               | -1.447785 | -0.659454 |
| 21               | 1                | 0              | -4.429727               | 0.985165  | -0.652645 |

## Standard orientation of Ts-B-d

Cartesian coordinates of all the transition states optimized at the LC- $\omega$ PBE/6-311++G(d,p) level:

Standard orientation of transition state of Ts-B-d

State = 1-A

Charge = 0    Multiplicity = 1

Lowest Harmonic Vibrational Frequency (LHVF) = -814.48 cm<sup>-1</sup>

Standard orientation:

| Center<br>Number | Atomic<br>Number | Atomic<br>Type | Coordinates (Angstroms) |           |           |
|------------------|------------------|----------------|-------------------------|-----------|-----------|
|                  |                  |                | X                       | Y         | Z         |
| 1                | 7                | 0              | -1.403743               | -1.137864 | 0.317166  |
| 2                | 6                | 0              | -0.127525               | -1.780494 | -0.058955 |
| 3                | 1                | 0              | -0.285548               | -2.232093 | -1.036709 |
| 4                | 1                | 0              | -0.011616               | -2.581448 | 0.676892  |
| 5                | 8                | 0              | -1.571187               | 0.148702  | -1.446050 |
| 6                | 1                | 0              | -0.746297               | 0.388011  | -1.877843 |
| 7                | 1                | 0              | -1.451492               | -0.137729 | 0.839364  |
| 8                | 8                | 0              | -2.396132               | -1.784685 | 0.284456  |
| 9                | 8                | 0              | -2.537781               | 2.182756  | -0.605409 |
| 10               | 1                | 0              | -3.478706               | 2.250640  | -0.780640 |
| 11               | 1                | 0              | -2.095349               | 1.196487  | -1.097014 |
| 12               | 8                | 0              | -1.811227               | 1.082727  | 1.507487  |
| 13               | 1                | 0              | -1.091755               | 1.554065  | 1.936970  |
| 14               | 1                | 0              | -2.164116               | 1.664087  | 0.723739  |
| 15               | 6                | 0              | 1.028850                | -0.829052 | -0.019969 |
| 16               | 6                | 0              | 1.472943                | -0.315400 | 1.193213  |
| 17               | 6                | 0              | 1.682329                | -0.470675 | -1.191885 |
| 18               | 6                | 0              | 2.538688                | 0.568777  | 1.229125  |
| 19               | 1                | 0              | 0.992375                | -0.614576 | 2.120234  |
| 20               | 6                | 0              | 2.754846                | 0.405763  | -1.155401 |
| 21               | 1                | 0              | 1.355860                | -0.886047 | -2.140440 |
| 22               | 6                | 0              | 3.179864                | 0.931514  | 0.054548  |
| 23               | 1                | 0              | 2.875896                | 0.967675  | 2.179448  |
| 24               | 1                | 0              | 3.259831                | 0.677855  | -2.075659 |
| 25               | 1                | 0              | 4.017762                | 1.619528  | 0.083571  |

## Standard orientation of Ts-B-d'

Cartesian coordinates of all the transition states optimized at the LC- $\omega$ PBE/6-311++G(d,p) level:

Standard orientation of transition state of Ts-B-d'

State = 1-A

Charge = 0    Multiplicity = 1

Lowest Harmonic Vibrational Frequency (LHVF) = -1120.48 cm<sup>-1</sup>

Standard orientation:

| Center<br>Number | Atomic<br>Number | Atomic<br>Type | Coordinates (Angstroms) |           |           |
|------------------|------------------|----------------|-------------------------|-----------|-----------|
|                  |                  |                | X                       | Y         | Z         |
| 1                | 7                | 0              | -1.266754               | -0.617518 | 0.080527  |
| 2                | 1                | 0              | -1.367096               | 0.474364  | -0.260384 |
| 3                | 6                | 0              | -0.166624               | -0.855037 | 1.043898  |
| 4                | 1                | 0              | -0.479517               | -0.350666 | 1.956218  |
| 5                | 1                | 0              | -0.147164               | -1.930959 | 1.220019  |
| 6                | 8                | 0              | -2.445608               | -1.008212 | 0.637675  |
| 7                | 8                | 0              | -1.863763               | 1.639930  | -0.823616 |
| 8                | 1                | 0              | -2.959329               | 1.379269  | -0.497658 |
| 9                | 1                | 0              | -1.557380               | 2.458777  | -0.426723 |
| 10               | 8                | 0              | -3.958275               | 0.741952  | -0.126704 |
| 11               | 1                | 0              | -3.202747               | -0.260491 | 0.334038  |
| 12               | 1                | 0              | -4.422103               | 1.197757  | 0.579558  |
| 13               | 8                | 0              | -0.979999               | -1.377673 | -1.054018 |
| 14               | 1                | 0              | -1.441168               | -0.942029 | -1.784702 |
| 15               | 6                | 0              | 1.149603                | -0.331179 | 0.546559  |
| 16               | 6                | 0              | 2.027019                | -1.159375 | -0.142701 |
| 17               | 6                | 0              | 1.507041                | 0.990789  | 0.783472  |
| 18               | 6                | 0              | 3.240748                | -0.670661 | -0.596869 |
| 19               | 1                | 0              | 1.756021                | -2.194049 | -0.324682 |
| 20               | 6                | 0              | 2.719269                | 1.482737  | 0.326160  |
| 21               | 1                | 0              | 0.836334                | 1.640975  | 1.337089  |
| 22               | 6                | 0              | 3.587114                | 0.652188  | -0.365283 |
| 23               | 1                | 0              | 3.920168                | -1.325464 | -1.131584 |
| 24               | 1                | 0              | 2.989161                | 2.515686  | 0.516904  |
| 25               | 1                | 0              | 4.538229                | 1.034704  | -0.719896 |

## Standard orientation of Ts-B-e

Cartesian coordinates of all the transition states optimized at the LC- $\omega$ PBE/6-311++G(d,p) level:

Standard orientation of transition state of Ts-B-e

State = 1-A

Charge = 0    Multiplicity = 1

Lowest Harmonic Vibrational Frequency (LHVF) = -172.77 cm<sup>-1</sup>

Standard orientation:

| Center<br>Number | Atomic<br>Number | Atomic<br>Type | Coordinates (Angstroms) |           |           |
|------------------|------------------|----------------|-------------------------|-----------|-----------|
|                  |                  |                | X                       | Y         | Z         |
| 1                | 7                | 0              | -1.193517               | -0.615344 | 0.103969  |
| 2                | 6                | 0              | -0.102401               | -0.524177 | 1.105523  |
| 3                | 1                | 0              | -0.129404               | -1.490864 | 1.614462  |
| 4                | 6                | 0              | 1.244611                | -0.195044 | 0.543849  |
| 5                | 6                | 0              | 2.127645                | -1.208655 | 0.193661  |
| 6                | 6                | 0              | 1.618452                | 1.130089  | 0.354143  |
| 7                | 6                | 0              | 3.368566                | -0.902253 | -0.341732 |
| 8                | 1                | 0              | 1.844642                | -2.245866 | 0.344166  |
| 9                | 6                | 0              | 2.857826                | 1.437734  | -0.182435 |
| 10               | 1                | 0              | 0.935710                | 1.927534  | 0.631090  |
| 11               | 6                | 0              | 3.734476                | 0.421330  | -0.531207 |
| 12               | 1                | 0              | 4.053061                | -1.700096 | -0.608461 |
| 13               | 1                | 0              | 3.142123                | 2.474637  | -0.324757 |
| 14               | 1                | 0              | 4.706541                | 0.661801  | -0.948119 |
| 15               | 8                | 0              | -0.939489               | -0.480670 | -1.040447 |
| 16               | 8                | 0              | -3.575699               | 0.611282  | -0.418505 |
| 17               | 8                | 0              | -2.900375               | 0.620951  | 0.686174  |
| 18               | 8                | 0              | -4.438214               | -0.313209 | -0.490561 |
| 19               | 1                | 0              | -0.462900               | 0.219276  | 1.819746  |

## Standard orientation of Ts-B-e'

Cartesian coordinates of all the transition states optimized at the LC- $\omega$ PBE/6-311++G(d,p) level:

Standard orientation of transition state of Ts-B-e'

State = 1-A

Charge = 0    Multiplicity = 1

Lowest Harmonic Vibrational Frequency (LHVF) = -1234.23 cm<sup>-1</sup>

Standard orientation:

| Center<br>Number | Atomic<br>Number | Atomic<br>Type | Coordinates (Angstroms) |           |           |
|------------------|------------------|----------------|-------------------------|-----------|-----------|
|                  |                  |                | X                       | Y         | Z         |
| 1                | 7                | 0              | 1.226060                | 1.309764  | -0.326559 |
| 2                | 6                | 0              | 0.602731                | 0.131814  | -0.495461 |
| 3                | 1                | 0              | 1.030216                | -0.543459 | -1.243463 |
| 4                | 8                | 0              | 2.410858                | 1.392154  | -0.718813 |
| 5                | 1                | 0              | 3.582134                | 0.045273  | -0.536957 |
| 6                | 8                | 0              | 4.020291                | -0.670781 | -0.025184 |
| 7                | 1                | 0              | 4.315056                | -1.337308 | -0.653176 |
| 8                | 1                | 0              | 2.858250                | -1.046286 | 0.934622  |
| 9                | 8                | 0              | 1.937222                | -1.109942 | 1.366652  |
| 10               | 1                | 0              | 1.960938                | -0.708568 | 2.245542  |
| 11               | 1                | 0              | 1.245057                | -0.498727 | 0.628839  |
| 12               | 6                | 0              | -0.856275               | 0.054395  | -0.257699 |
| 13               | 6                | 0              | -1.590883               | -0.963295 | -0.860200 |
| 14               | 6                | 0              | -1.521263               | 0.951480  | 0.577306  |
| 15               | 6                | 0              | -2.955539               | -1.078669 | -0.643862 |
| 16               | 1                | 0              | -1.087506               | -1.671518 | -1.511620 |
| 17               | 6                | 0              | -2.885009               | 0.839223  | 0.787074  |
| 18               | 1                | 0              | -0.960559               | 1.742461  | 1.062774  |
| 19               | 6                | 0              | -3.610249               | -0.176423 | 0.179133  |
| 20               | 1                | 0              | -3.509453               | -1.878071 | -1.125006 |
| 21               | 1                | 0              | -3.386597               | 1.549075  | 1.436793  |
| 22               | 1                | 0              | -4.678005               | -0.263828 | 0.348574  |

## Standard orientation of Ts-B-f

Cartesian coordinates of all the transition states optimized at the LC- $\omega$ PBE/6-311++G(d,p) level:

Standard orientation of transition state of Ts-B-f

State = 1-A

Charge = 0 Multiplicity = 1

Lowest Harmonic Vibrational Frequency (LHVF) = -250.70 cm<sup>-1</sup>

Standard orientation:

| Center<br>Number | Atomic<br>Number | Atomic<br>Type | Coordinates (Angstroms) |           |           |
|------------------|------------------|----------------|-------------------------|-----------|-----------|
|                  |                  |                | X                       | Y         | Z         |
| 1                | 7                | 0              | -1.291351               | -0.901937 | 0.026895  |
| 2                | 6                | 0              | -0.270192               | -0.764058 | 1.085496  |
| 3                | 1                | 0              | -0.708185               | -0.069530 | 1.798263  |
| 4                | 1                | 0              | -0.176579               | -1.751310 | 1.544502  |
| 5                | 8                | 0              | -2.509114               | -1.141220 | 0.530000  |
| 6                | 8                | 0              | -0.910584               | -1.835840 | -0.872723 |
| 7                | 8                | 0              | -2.584211               | 1.148821  | -0.556518 |
| 8                | 8                | 0              | -2.350162               | 1.971096  | 0.475741  |
| 9                | 8                | 0              | -1.528828               | 0.587250  | -0.998282 |
| 10               | 1                | 0              | -1.417273               | -1.658329 | -1.682050 |
| 11               | 6                | 0              | 1.042674                | -0.268081 | 0.554377  |
| 12               | 6                | 0              | 2.049952                | -1.163407 | 0.220215  |
| 13               | 6                | 0              | 1.267207                | 1.097336  | 0.425767  |
| 14               | 6                | 0              | 3.269372                | -0.699418 | -0.246923 |
| 15               | 1                | 0              | 1.880891                | -2.229917 | 0.328565  |
| 16               | 6                | 0              | 2.485360                | 1.561230  | -0.041748 |
| 17               | 1                | 0              | 0.476762                | 1.793140  | 0.687003  |
| 18               | 6                | 0              | 3.487116                | 0.663096  | -0.379150 |
| 19               | 1                | 0              | 4.052693                | -1.404015 | -0.503823 |
| 20               | 1                | 0              | 2.655412                | 2.627929  | -0.139255 |
| 21               | 1                | 0              | 4.442447                | 1.027131  | -0.741937 |
| 22               | 1                | 0              | -3.092449               | -0.422576 | 0.186537  |

## Standard orientation of Ts-B-f

Cartesian coordinates of all the transition states optimized at the LC- $\omega$ PBE/6-311++G(d,p) level:

Standard orientation of transition state of Ts-B-f

State = 1-A

Charge = 0 Multiplicity = 1

Lowest Harmonic Vibrational Frequency (LHVF) = -777.43 cm<sup>-1</sup>

Standard orientation:

| Center<br>Number | Atomic<br>Number | Atomic<br>Type | Coordinates (Angstroms) |           |           |
|------------------|------------------|----------------|-------------------------|-----------|-----------|
|                  |                  |                | X                       | Y         | Z         |
| 1                | 7                | 0              | 1.063134                | -0.425604 | 0.051075  |
| 2                | 8                | 0              | 1.208771                | 0.102366  | -1.141810 |
| 3                | 1                | 0              | 2.053555                | 1.235055  | -0.931980 |
| 4                | 8                | 0              | 2.286935                | -1.410694 | 0.253192  |
| 5                | 1                | 0              | 2.449728                | -1.766142 | -0.636529 |
| 6                | 8                | 0              | 2.808284                | 1.928039  | -0.663369 |
| 7                | 1                | 0              | 2.394933                | 2.702076  | -0.271934 |
| 8                | 1                | 0              | 3.181388                | -0.600255 | 0.560995  |
| 9                | 8                | 0              | 3.880886                | 0.289586  | 0.829180  |
| 10               | 1                | 0              | 3.523587                | 1.092983  | 0.238926  |
| 11               | 1                | 0              | 4.803784                | 0.106655  | 0.621033  |
| 12               | 6                | 0              | -0.060984               | -1.377852 | 0.056020  |
| 13               | 1                | 0              | 0.044067                | -1.993189 | 0.949086  |
| 14               | 1                | 0              | -0.004036               | -2.011199 | -0.835640 |
| 15               | 6                | 0              | -1.357117               | -0.616553 | 0.089554  |
| 16               | 6                | 0              | -2.174197               | -0.550097 | -1.030569 |
| 17               | 6                | 0              | -1.753012               | 0.036371  | 1.252366  |
| 18               | 6                | 0              | -3.368122               | 0.155448  | -0.992807 |
| 19               | 1                | 0              | -1.873478               | -1.056276 | -1.942414 |
| 20               | 6                | 0              | -2.941333               | 0.746680  | 1.292072  |
| 21               | 1                | 0              | -1.122861               | -0.014923 | 2.135074  |
| 22               | 6                | 0              | -3.753122               | 0.806648  | 0.168075  |
| 23               | 1                | 0              | -3.998829               | 0.196356  | -1.874581 |
| 24               | 1                | 0              | -3.239129               | 1.250922  | 2.205325  |
| 25               | 1                | 0              | -4.686332               | 1.358910  | 0.199314  |

## Standard orientation of Ts-B-f'

Cartesian coordinates of all the transition states optimized at the LC- $\omega$ PBE/6-311++G(d,p) level:

Standard orientation of transition state of Ts-B-f'

State = 1-A

Charge = 0 Multiplicity = 1

Lowest Harmonic Vibrational Frequency (LHVF) = -158.64 cm<sup>-1</sup>

Standard orientation:

| Center<br>Number | Atomic<br>Number | Atomic<br>Type | Coordinates (Angstroms) |           |           |
|------------------|------------------|----------------|-------------------------|-----------|-----------|
|                  |                  |                | X                       | Y         | Z         |
| 1                | 8                | 0              | -3.078795               | 0.289590  | -0.644529 |
| 2                | 1                | 0              | -2.782253               | -0.712634 | -0.695032 |
| 3                | 1                | 0              | -3.622840               | 0.358029  | 0.145513  |
| 4                | 8                | 0              | -2.236478               | -2.067862 | -0.634322 |
| 5                | 1                | 0              | -2.897010               | -2.746663 | -0.785576 |
| 6                | 1                | 0              | -1.899644               | -1.832343 | 0.802992  |
| 7                | 8                | 0              | -1.656861               | -1.472889 | 1.741608  |
| 8                | 1                | 0              | -0.953047               | -2.031427 | 2.080138  |
| 9                | 1                | 0              | -0.980290               | 0.132997  | 1.063693  |
| 10               | 8                | 0              | -1.536365               | 2.536362  | -0.322716 |
| 11               | 1                | 0              | -1.995812               | 2.776395  | -1.155506 |
| 12               | 7                | 0              | -1.007896               | 1.420501  | -0.486886 |
| 13               | 6                | 0              | -0.341796               | 0.973301  | 0.675419  |
| 14               | 1                | 0              | -0.286344               | 1.755708  | 1.434248  |
| 15               | 6                | 0              | 0.986349                | 0.377699  | 0.267422  |
| 16               | 6                | 0              | 1.027611                | -0.838774 | -0.402290 |
| 17               | 6                | 0              | 2.160384                | 1.051396  | 0.567995  |
| 18               | 6                | 0              | 2.249556                | -1.377341 | -0.768530 |
| 19               | 1                | 0              | 0.100475                | -1.359464 | -0.630225 |
| 20               | 6                | 0              | 3.382283                | 0.501807  | 0.208735  |
| 21               | 1                | 0              | 2.124313                | 2.003822  | 1.086948  |
| 22               | 6                | 0              | 3.427026                | -0.709968 | -0.461036 |
| 23               | 1                | 0              | 2.284401                | -2.326947 | -1.291442 |
| 24               | 1                | 0              | 4.300179                | 1.026181  | 0.450660  |
| 25               | 1                | 0              | 4.382663                | -1.137476 | -0.744822 |



## Standard orientation of Ts-B-g

Cartesian coordinates of all the transition states optimized at the LC- $\omega$ PBE/6-311++G(d,p) level:

Standard orientation of transition state of Ts-B-g

State = 1-A

Charge = 0 Multiplicity = 1

Lowest Harmonic Vibrational Frequency (LHVF) = -370.48 cm<sup>-1</sup>

Standard orientation:

| Center<br>Number | Atomic<br>Number | Atomic<br>Type | Coordinates (Angstroms) |           |           |
|------------------|------------------|----------------|-------------------------|-----------|-----------|
|                  |                  |                | X                       | Y         | Z         |
| 1                | 7                | 0              | -0.825833               | -0.227136 | 0.050231  |
| 2                | 8                | 0              | -1.077557               | 0.972358  | 0.476388  |
| 3                | 1                | 0              | -1.909174               | 1.391528  | -0.106389 |
| 4                | 8                | 0              | -2.339992               | -1.250292 | 0.944866  |
| 5                | 1                | 0              | -2.423917               | -0.974578 | 1.863377  |
| 6                | 8                | 0              | -3.017139               | 1.810143  | -0.748838 |
| 7                | 1                | 0              | -3.552260               | -0.799185 | 0.170544  |
| 8                | 1                | 0              | -3.429909               | 2.583593  | -0.350941 |
| 9                | 8                | 0              | -4.288317               | -0.392980 | -0.430486 |
| 10               | 1                | 0              | -3.659608               | 1.032144  | -0.668256 |
| 11               | 1                | 0              | -5.119437               | -0.444578 | 0.047758  |
| 12               | 8                | 0              | -1.020843               | -0.523470 | -1.088909 |
| 13               | 6                | 0              | 0.241442                | -0.919285 | 0.841067  |
| 14               | 1                | 0              | 0.088138                | -1.975192 | 0.643698  |
| 15               | 1                | 0              | 0.039370                | -0.694456 | 1.883434  |
| 16               | 6                | 0              | 1.586271                | -0.425025 | 0.388258  |
| 17               | 6                | 0              | 2.235070                | -1.045495 | -0.672137 |
| 18               | 6                | 0              | 2.188911                | 0.651389  | 1.027157  |
| 19               | 6                | 0              | 3.472999                | -0.589438 | -1.094248 |
| 20               | 1                | 0              | 1.771072                | -1.892588 | -1.167053 |
| 21               | 6                | 0              | 3.427589                | 1.106514  | 0.606020  |
| 22               | 1                | 0              | 1.687203                | 1.133615  | 1.859981  |
| 23               | 6                | 0              | 4.069244                | 0.487337  | -0.455847 |
| 24               | 1                | 0              | 3.975965                | -1.079684 | -1.920490 |
| 25               | 1                | 0              | 3.894788                | 1.944852  | 1.110919  |
| 26               | 1                | 0              | 5.040220                | 0.842428  | -0.783980 |

## Standard orientation of Ts-B-h

Cartesian coordinates of all the transition states optimized at the LC- $\omega$ PBE/6-311++G(d,p) level:

Standard orientation of transition state of Ts-B-h

State = 1-A

Charge = -1    Multiplicity = 1

Lowest Harmonic Vibrational Frequency (LHVF) = -151.19 cm<sup>-1</sup>

Standard orientation:

| Center<br>Number | Atomic<br>Number | Atomic<br>Type | Coordinates (Angstroms) |           |           |
|------------------|------------------|----------------|-------------------------|-----------|-----------|
|                  |                  |                | X                       | Y         | Z         |
| 1                | 7                | 0              | -1.684685               | -1.181836 | 0.304730  |
| 2                | 8                | 0              | -0.988262               | 2.007476  | -0.557438 |
| 3                | 8                | 0              | -1.442057               | 0.939223  | -1.233676 |
| 4                | 8                | 0              | -1.714770               | 2.318044  | 0.455889  |
| 5                | 8                | 0              | -2.728232               | -1.675764 | -0.179387 |
| 6                | 6                | 0              | -0.728931               | -0.738952 | -0.585451 |
| 7                | 1                | 0              | -0.887782               | -1.164418 | -1.566043 |
| 8                | 6                | 0              | 0.651021                | -0.447348 | -0.201319 |
| 9                | 6                | 0              | 1.634773                | -0.730773 | -1.151536 |
| 10               | 6                | 0              | 1.032476                | 0.133417  | 1.008489  |
| 11               | 6                | 0              | 2.967186                | -0.465879 | -0.894082 |
| 12               | 1                | 0              | 1.347889                | -1.171147 | -2.101198 |
| 13               | 6                | 0              | 2.368231                | 0.399267  | 1.260759  |
| 14               | 1                | 0              | 0.281022                | 0.371369  | 1.747639  |
| 15               | 6                | 0              | 3.338668                | 0.098641  | 0.317437  |
| 16               | 1                | 0              | 3.717739                | -0.701352 | -1.640667 |
| 17               | 1                | 0              | 2.652735                | 0.849330  | 2.205851  |
| 18               | 8                | 0              | -1.536960               | -1.052575 | 1.536069  |
| 19               | 1                | 0              | 4.382897                | 0.307600  | 0.523862  |
